# Supplementary material for: PDMS-based flexible and conductive composite films containing modified PEDOT:PSS coated channels as a potential neural conduit
Source: Royal Society of Chemistry journal article supplement (doi:10.1039/d4ma01205d), 2025-01-01
Supplement: d4ma01205d1.pdf [file d4ma01205d1.pdf]

**Electronic Supplementary Information (ESI) for**

# **PDMS-Based Flexible and Conductive Composite Films Containing Modified PEDOT:PSS Coated Channels as a Potential Neural Conduit**

**Orhan Gokalp Buyukuysal<sup>1</sup>, Busra Kilic<sup>2</sup>, Cagatay Karaaslan<sup>1,2</sup>, Dincer Gokcen<sup>3</sup>, Cem Bayram<sup>4</sup> and Halil Murat Aydin<sup>1,5</sup>**

<sup>1</sup> Bioengineering Division, Institute of Science, Hacettepe University, Ankara, Turkey

<sup>2</sup> Department of Biology, Molecular Biology Section, Hacettepe University, Ankara, Turkey

<sup>3</sup> Department of Electrical and Electronics Engineering, Hacettepe University, Ankara, Turkey

<sup>4</sup> Nanotechnology and Nanomedicine Division, Institute of Science, Hacettepe University, Ankara, Turkey

<sup>5</sup> Centre for Bioengineering, Hacettepe University, Ankara, Turkey

\*Corresponding Author:

Prof. Dr. Halil Murat AYDIN

E-mail: hmaydin@hacettepe.edu.tr

Tel: (+90) 312 297 78 00

Bioengineering Division and Centre for Bioengineering,  
Hacettepe University, 06800, Ankara, Turkey

**9 Pages**

## 1. MATERIALS AND METHOD

### 1.1. Degradation Test

The degradation test was applied to determine the degradation and dissolution tendencies of the obtained films. The analysis is planned to last 28 days in total. PBS was chosen as the medium. Film samples were cut with a scalpel to have dimensions of 5×5 mm, placed in falcones containing 70% ethanol, cleaned by mixing in a thermoshaker device at 50 rpm at room temperature, dried in a lyophilizer before the process, weighed on a precision scale and their initial weights were noted. The study was conducted on 3 samples in each solution. The samples were placed in a 50 ml falcon and treated at 37°C with a stirring speed of 30 rpm. The pH of the media containing the samples was measured on the 1st, 7th, 14th, 21st, and 28th days of the experiment by removing the samples from the experimental setup, and to understand the weight losses, the samples were washed with deionized water, dried in a lyophilizer, and weighed. Mass loss results were calculated with Equation-1 given below. After the experiment, % weight loss graphs of the films and pH measurements for different days were created and shared under the relevant heading in the results section.

$$\%Mass\ Loss = \frac{W0 - W1}{W0} \times 100 \quad (1)$$

W0 represents the initial dry weight, W1 represents the final dry weight.

### 1.2. Swelling Test

The swelling behavior of the composite films was examined by swelling tests. 5x5 mm sized samples cut from the films were tested in a PBS environment. At the beginning of the test, the dry weights of the samples were measured by lyophilizing them at -80oC and then they were kept in PBS for 24 hours. At the end of the 1st, 6th, 12th and 24th hours, after collecting the excess wetness on the samples with filter paper, wet weight measurements were made and graphs were shared in the results section.

$$\%Swelling\ Rate = \frac{H1 - H0}{H0} \times 100 \quad (2)$$

H1 represents wet weight, H0 represents dry weight.

## 2. RESULTS AND DISCUSSION

### 2.1. Atomic Absorption Spectroscopy (AAS)

Calibration curves were prepared based on the prepared iron and sodium standards and the results obtained were interpreted based on the calibration curves. The samples were diluted with deionized water at ratios of 1:10, 1:50 and 1:100, and analyzes were performed on these samples. Since ion determination could not be performed efficiently in samples with 1:10 and 1:50 dilution ratios, the analysis was interpreted on samples with 1:100 dilution ratios.

The absorption reading of iron ion decreased from 0.1584 in the PPAD-BIE sample to 0.0139 in the PPAD-AIE sample. The density reading of sodium ion decreased from 1.2575 in the PPAD-BIE sample to 1.1412 in the PPAD-AIE sample. Looking at the values obtained from the calibration curve, iron ion decreased from 19 ppm to 1 ppm, and sodium ion decreased from 2.5 ppm to 2 ppm.

Table 1. Iron and Sodium Ion Density Measurements for PPAD-BIE and PPSD-AIE.

|                         |          | <b>1.Absorbance Reading</b> | <b>2.Absorbance Reading</b> | <b>3.Absorbance Reading</b> | <b>Average Absorbance</b> |
|-------------------------|----------|-----------------------------|-----------------------------|-----------------------------|---------------------------|
| <b>IRON<br/>1:100</b>   | PPAD-BIE | 0.1568                      | 0.1592                      | 0.1591                      | 1.1584 ± 0.001            |
|                         | PPAD-AIE | 0.0147                      | 0.0133                      | 0.0136                      | 0.0139 ± 0.0007           |
| <b>SODIUM<br/>1:100</b> | PPAD-BIE | 1.2574                      | 1.2577                      | 1.2575                      | 1.2575 ± 0.0001           |
|                         | PPAD-AIE | 1.1390                      | 1.1421                      | 1.1424                      | 1.1412 ± 0.001            |

As can be seen from the results, it is understood that as a result of the ion exchange process with the dialysis membrane, the majority of the Iron Ion and a certain part of the Sodium Ion are successfully removed from PPAD.

## 2.2. Fourier Transform Infrared Spectroscopy (FTIR)

There are PEDOT:PSS characteristic peaks in the PPAD-BIE (Blue) and PPAD-AIE (Red) spectra. For both samples, the peaks at 3300  $\text{cm}^{-1}$  represent the stretching vibration of hydroxyl groups (O-H)<sup>1</sup>, the peaks at 1573 and 1468  $\text{cm}^{-1}$  represent the stretching vibration in the conjugated alkene (C = C) structure of PEDOT:PSS polymer<sup>2</sup>, The peaks at 1268  $\text{cm}^{-1}$  represent the S = O vibration<sup>3</sup>, the peaks at 1161, 1117 and 1068  $\text{cm}^{-1}$  represent the C-O-C structure vibration<sup>4</sup>, the peaks at 864 and 711  $\text{cm}^{-1}$  represent the aromatic sulfonate ester group<sup>5</sup>. The biggest difference in the peaks of BIE and AIE samples is that the O-H peak in the AIE spectrum is much weaker compared to BIE. It can be said that the reason for this is the decreasing number of OH<sup>-</sup> ions due to the OH<sup>-</sup> and H<sup>+</sup> ions combined to form water molecules during the ion exchange process.

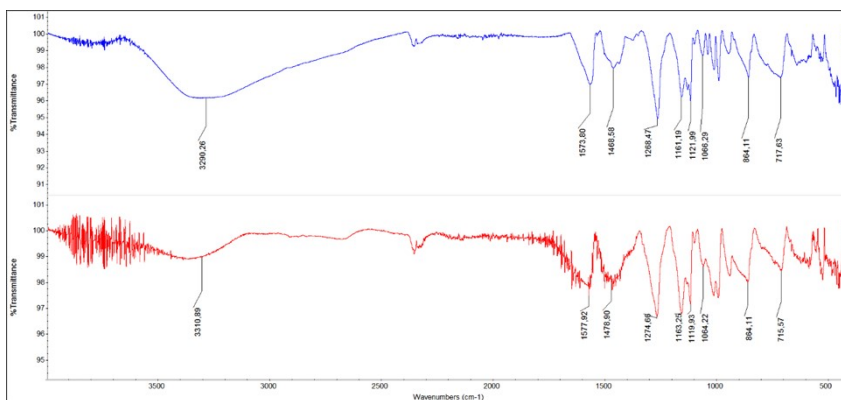

Figure 1. FTIR results of PPAD-BIE and PPAD-AIE.

There are PEDOT:PSS characteristic peaks in the PPAD (Blue) and PPAD/LiTFSI (Red) spectra. The symmetric bending of  $\text{CF}_3$ , C–S, S–N stretching at  $744 \text{ cm}^{-1}$  and the asymmetric bending of  $\text{CF}_3$  at  $610 \text{ cm}^{-1}$  indicate the presence of LiTFSI in the PPAD content<sup>6</sup>. Other peaks are peaks already present in PPAD.

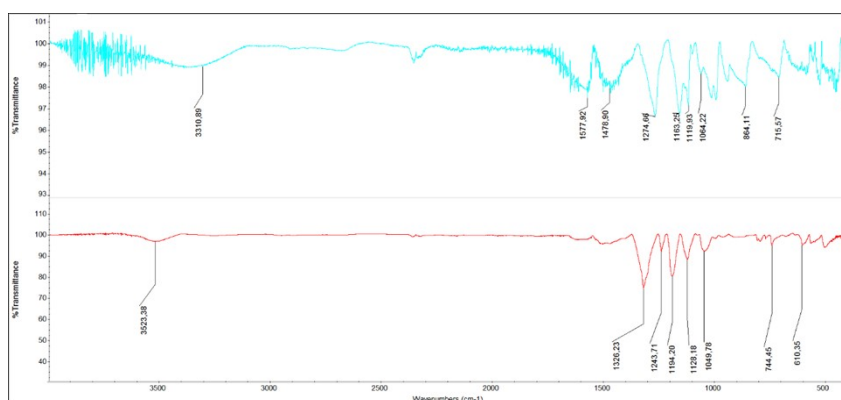

Figure 2. FTIR results of PPAD and PPAD-LiTFSI.

PDMS films match the literature. The peaks at  $2963 \text{ cm}^{-1}$  and  $2901 \text{ cm}^{-1}$  both represent the absorption bands of methyl group Si- $\text{CH}_3$  extensions, the peak at  $1260 \text{ cm}^{-1}$  represents Si- $\text{CH}_3$  extensions, the peak at  $1008 \text{ cm}^{-1}$  represents Si–O–Si extensions; The peak at  $849 \text{ cm}^{-1}$  represents  $\equiv\text{Si-OH}$  stretching and the peak at  $790 \text{ cm}^{-1}$  represents  $-\text{CH}_3$  vibration absorption<sup>7,8</sup>.

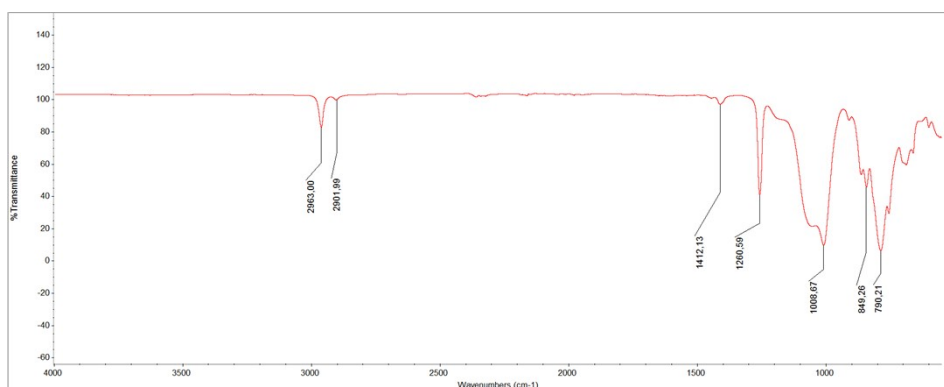

Figure 3. FTIR results of PDMS.

## 2.3. Electrical Characterizations

### 2.3.1. Resistance Measurements

Resistance measurements of composite films were obtained as two different parameters, before stretching and after stretching (measurements are recorded when the sample is released). Conventional resistance measurements are done by placing the 4-probe in different parts of each channel. The increase in the resistance of the films after stretching gives an idea about the coating quality. The reason for the increase in resistance after stretching is that conduction paths are partially deformed as a result of cracks occurring in the coatings after stretching.

Looking at the resistance measurements of the PPAD-RAL-EG-PDMS composite film, the resistances of the 4 channels and the top channel above them before stretching are at close values. In measurements after stretching, all regions except channel 1 showed an increase in resistance at values close to each other. The mean values of the resistance measurements are given in the following text.

After stretching, the 1st channel resistance increases from 826.67 Ohm to 4467 Ohm, the 2nd channel resistance increases from 924 Ohm to 2121.67 Ohm, the 3rd channel resistance increases from 894.33 Ohm to 2852 Ohm, the 4th channel resistance increases from 866 Ohm to 2390 Ohm and the top channel resistance increased from 638.33 Ohm to 2730.33 Ohm.

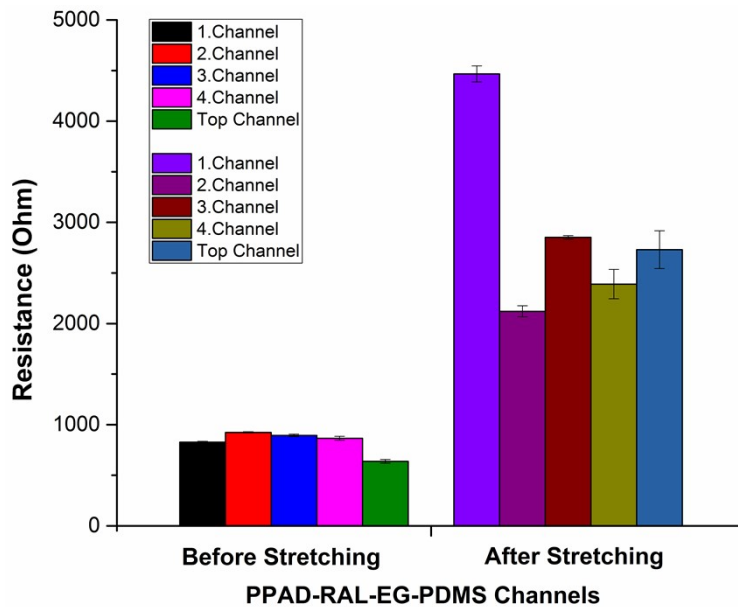

Figure 4. PPAD-AIE-RAL-EG - PDMS before and after stretching resistance measurements.

The resistance values of the PPAD-LiTFSI-RAL-EG-PDMS composite film were higher than the PPAD sample. As explained in the previous sections, this is an expected result. As can

be seen in the SEM images (Figure 9), the high coating thickness caused high resistance measurements as expected.

After stretching, the 1st channel resistance increases from 1561.67 Ohm to 4122.67 Ohm, the 2nd channel resistance increases from 1340.33 Ohm to 1937.67 Ohm, the 3rd channel resistance increases from 1590.33 Ohm to 4536.00 Ohm, the 4th channel resistance increased from 1758.33 Ohm to 4462.67 Ohm and the top channel resistance increased from 1653.00 Ohm to 2205.67 Ohm.

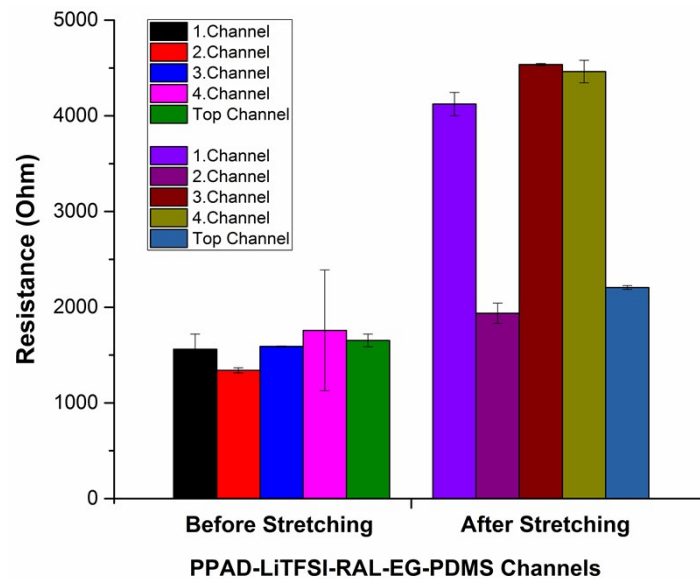

Figure 5. PPAD-LiTFSI-RAL-EG - PDMS before and after stretching resistance measurements.

## 2.4. Degradation Test

The degradation behavior of the polymer depends on factors such as the types of chemical bonds formed by the mer units and the agitation rate and pH of the environment in which the polymer is placed to degrade. The pH of the medium can change the rate of hydrolysis of chemical bonds, as well as the amount of dissolution of materials<sup>9</sup>.

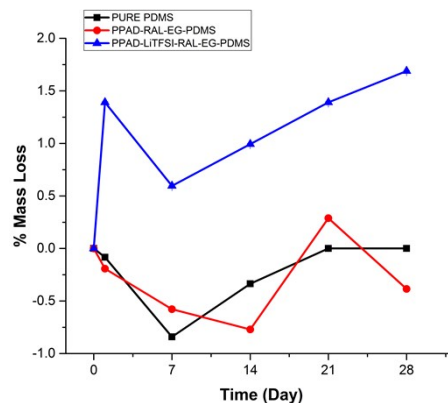

Figure 6. Mass loss results of composite films.

When we examine the PDMS group, it is seen that it has a high resistance to degradation. Since PDMS is a cross-linked polymer<sup>10</sup>, this is an expected result. When the obtained graphs are examined, it is seen that in sample groups other than the PPAD-LiTFSI-RAL-EG-PDMS group, the swelling tendency dominates the degradation tendency and the films gain more mass instead of losing mass. It is observed that on days when mass loss occurs, the level does not exceed 0.5%. It is thought that the reason why the PPAD-LiTFSI-RAL-EG group reached a higher mass loss is that the samples used may have various damages and ruptures and therefore the degradation result was higher.

Degradation can also be defined as the emergence of monomers in time-buffered environments<sup>9</sup>, and pH change can be evaluated through this definition. When we look at the pH change graph of the PDMS group, we see that the pH values increase and decrease consecutively in the form of fluctuations. The reason for this has been interpreted as swelling and degradation tendencies dominating each other on certain days. There was no significant change in PBS pH on the 1st day, but it was observed that the pH decreased on the 7th day. It can be said that the conductive polymer coatings on the surface of the composite films are separated from the surface and the H<sup>+</sup> ion density in the PBS increases and therefore the acidity value increases. On the 14th day, results parallel to the 7th day were obtained, but although a slight increase in pH was observed on the 21st day, the pH values on the 28th day remained stable in the same band as the results on the 7th and 14th days. It is thought that this fluctuation in pH change is due to the fact that the films tend to swell as they degrade.

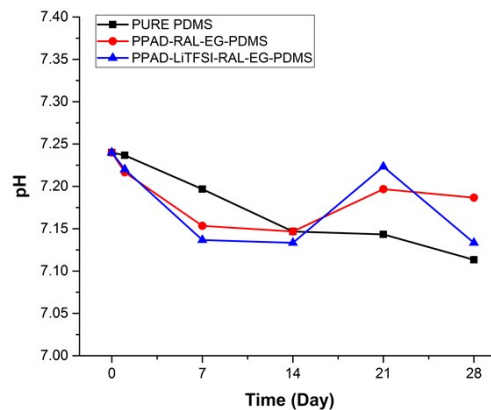

Figure 7. pH change results of composite films during the degradation test.

## 2.5. Swelling Test

Swelling properties are important in tissue engineering applications, as inadequate water absorption leads to inhibition of cell growth<sup>11</sup>. When the graphs are examined, it is seen that

the water retention properties of PDMS-based composite films are low. This shows that results matching the literature were obtained<sup>12</sup>.

In the swelling test of the PDMS group, it is seen that the swelling tendency of the pure PDMS sample increases slowly linearly compared to the conductive polymer-coated samples. The same behavior was observed in conductive polymer-coated samples, but the swelling ratio resulted to be less. It is thought that the reason for this is that the coatings are removed from the PDMS surface as a result of temperature and shaking movement. It can be seen from the graph that the PPAD-RAL-EG sample is the group that is least removed from the PDMS surface. This shows that the PPAD-RAL-EG coating quality is better than other groups.

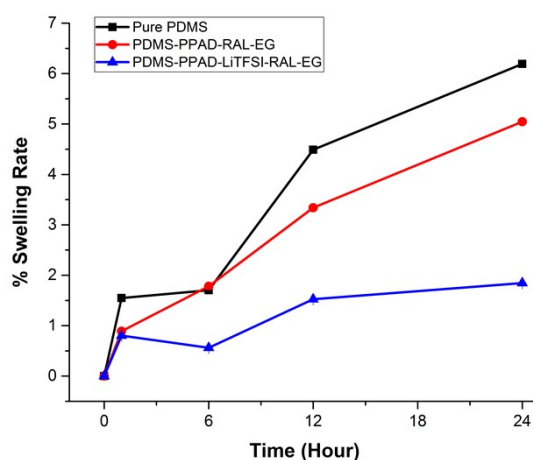

Figure 8. Swelling test results of composite films.

### 3. REFERENCES

- 1 D. Alemu, H. Y. Wei, K. C. Ho and C. W. Chu, *Energy Environ Sci*, 2012, **5**, 9662–9671.
- 2 S. K. Jebur, A. J. Braihi and A. S. Hassan, in *Materials Today: Proceedings*, Elsevier Ltd, 2022, vol. 49, pp. 2733–2740.
- 3 Y. Liu, D. Sun, S. Askari, J. Patel, M. Macias-Montero, S. Mitra, R. Zhang, W. F. Lin, D. Mariotti and P. Maguire, *Sci Rep*, , DOI:10.1038/srep15765.
- 4 J. Ram, R. G. Singh, F. Singh, V. Kumar, V. Chauhan, R. Gupta, U. Kumar, B. C. Yadav and R. Kumar, *Journal of Materials Science: Materials in Electronics*, 2019, **30**, 13593–13603.
- 5 Z. Zhu, C. Liu, J. Xu, Q. Jiang, H. Shi and E. Liu, *Electronic Materials Letters*, 2016, **12**, 54–58.
- 6 J. Yan, Y. Qin, W. T. Fan, W. T. Wu, S. W. Lv, L. P. Yan, Y. L. Liu and W. H. Huang, *Chem Sci*, 2021, **12**, 14432–14440.
- 7 D. Bodas and C. Khan-Malek, *Microelectron Eng*, 2006, **83**, 1277–1279.
- 8 C. De Menezes Atayde and I. Doi, in *Physica Status Solidi (C) Current Topics in Solid State Physics*, 2010, vol. 7, pp. 189–192.



- 9 K. E. Uhrich, T. T. Thomas, C. T. Laurencin and R. Langer, *J Appl Polym Sci*, 1997, **63**, 1401–1411.
- 10 M. Liu, J. Sun, Y. Sun, C. Bock and Q. Chen, *Journal of Micromechanics and Microengineering*, , DOI:10.1088/0960-1317/19/3/035028.
- 11 F. Nazir, M. Iqbal, A. N. Khan, M. Mazhar and Z. Hussain, *Journal of Materials Research and Technology*, 2021, **13**, 1732–1751.
- 12 W. Du, Z. Zhang and Z. Li, *Polym Int*, 2019, **68**, 1739–1747.

## 4. RAW DATA OF THE MANUSCRIPT AND ESI ANALYSES

### 4.A. MANUSCRIPT ANALYSES

#### 4.A.1. Particle Size Distribution Analysis

##### 4.A.1.1 PPAD-BIE

|        |     |     |     |
|--------|-----|-----|-----|
| 0.4    | 0   | 0   | 0   |
| 0.4632 | 0   | 0   | 0   |
| 0.5365 | 0   | 0   | 0   |
| 0.6213 | 0   | 0   | 0   |
| 0.7195 | 0   | 0.1 | 0   |
| 0.8332 | 0   | 0.2 | 0   |
| 0.9649 | 0   | 0.4 | 0   |
| 1.117  | 0   | 0.6 | 0   |
| 1.294  | 0   | 0.8 | 0   |
| 1.499  | 0   | 0.9 | 0   |
| 1.736  | 0   | 0.9 | 0   |
| 2.01   | 0   | 0.8 | 0   |
| 2.328  | 0   | 0.7 | 0   |
| 2.696  | 0   | 0.5 | 0.1 |
| 3.122  | 0   | 0.3 | 0.3 |
| 3.615  | 0   | 0.2 | 0.6 |
| 4.187  | 0   | 0.1 | 0.8 |
| 4.849  | 0   | 0.1 | 0.9 |
| 5.615  | 0   | 0.1 | 0.9 |
| 6.503  | 0   | 0.1 | 0.9 |
| 7.531  | 0   | 0.1 | 0.7 |
| 8.721  | 0   | 0.1 | 0.5 |
| 10.1   | 0   | 0.2 | 0.3 |
| 11.7   | 0   | 0.1 | 0.1 |
| 13.54  | 0   | 0.1 | 0   |
| 15.69  | 0   | 0.1 | 0   |
| 18.17  | 0   | 0   | 0   |
| 21.04  | 0.1 | 0   | 0   |
| 24.36  | 0.2 | 0   | 0   |
| 28.21  | 0.4 | 0   | 0   |
| 32.67  | 0.7 | 0   | 0   |
| 37.84  | 1   | 0   | 0   |

|       |      |      |      |
|-------|------|------|------|
| 43.82 | 1.3  | 0    | 0    |
| 50.75 | 1.6  | 0.1  | 0    |
| 58.77 | 1.7  | 0.3  | 0    |
| 68.06 | 1.7  | 0.5  | 0    |
| 78.82 | 1.6  | 0.8  | 0    |
| 91.28 | 1.4  | 1    | 0    |
| 105.7 | 1.2  | 1.2  | 0    |
| 122.4 | 0.9  | 1.3  | 0    |
| 141.8 | 0.6  | 1.3  | 0    |
| 164.2 | 0.3  | 1.2  | 0    |
| 190.1 | 0.1  | 0.9  | 0    |
| 220.2 | 0    | 0.7  | 0    |
| 255   | 0    | 0.4  | 0    |
| 295.3 | 0    | 0.2  | 0    |
| 342   | 0    | 0    | 0    |
| 396.1 | 0    | 0    | 0    |
| 458.7 | 0    | 0    | 0    |
| 531.2 | 0    | 0    | 0    |
| 615.1 | 0    | 0    | 0    |
| 712.4 | 0    | 0    | 0    |
| 825   | 0    | 0    | 0    |
| 955.4 | 0    | 0    | 0    |
| 1106  | 0    | 0    | 0    |
| 1281  | 0    | 0    | 0    |
| 1484  | 0.4  | 0.2  | 0.3  |
| 1718  | 1.4  | 0.9  | 1.2  |
| 1990  | 3    | 2.3  | 2.9  |
| 2305  | 5.2  | 4.4  | 5.3  |
| 2669  | 7.7  | 7    | 8.2  |
| 3091  | 10.3 | 9.8  | 11.3 |
| 3580  | 12.7 | 12.4 | 14.1 |
| 4145  | 14.4 | 14.4 | 16.2 |
| 4801  | 15.2 | 15.5 | 17.3 |
| 5560  | 14.8 | 15.3 | 16.9 |
| 6439  | 0    | 0    | 0    |
| 7456  | 0    | 0    | 0    |
| 8635  | 0    | 0    | 0    |
| 10000 | 0    | 0    | 0    |

#### 4.A.1.2 PPAD-BIE

|        |   |   |     |
|--------|---|---|-----|
| 0.4    | 0 | 0 | 0   |
| 0.4632 | 0 | 0 | 0   |
| 0.5365 | 0 | 0 | 0   |
| 0.6213 | 0 | 0 | 1.2 |
| 0.7195 | 0 | 0 | 1.1 |
| 0.8332 | 0 | 0 | 1.4 |
| 0.9649 | 0 | 0 | 1.2 |
| 1.117  | 0 | 0 | 0.5 |
| 1.294  | 0 | 0 | 0   |
| 1.499  | 0 | 0 | 0   |
| 1.736  | 0 | 0 | 0   |
| 2.01   | 0 | 0 | 0   |
| 2.328  | 0 | 0 | 0   |
| 2.696  | 0 | 0 | 0   |
| 3.122  | 0 | 0 | 0   |

|       |      |      |      |
|-------|------|------|------|
| 3.615 | 0    | 0    | 0    |
| 4.187 | 0    | 0    | 0    |
| 4.849 | 0    | 0    | 0    |
| 5.615 | 0    | 0    | 0    |
| 6.503 | 0    | 0    | 0    |
| 7.531 | 0    | 0    | 0    |
| 8.721 | 0    | 0    | 0    |
| 10.1  | 0    | 0    | 0    |
| 11.7  | 0    | 0    | 0    |
| 13.54 | 0    | 0    | 0    |
| 15.69 | 0    | 0    | 0    |
| 18.17 | 0    | 0    | 0    |
| 21.04 | 0    | 0    | 0    |
| 24.36 | 0    | 0    | 0    |
| 28.21 | 0    | 0    | 0    |
| 32.67 | 0    | 0    | 0    |
| 37.84 | 0    | 0    | 0    |
| 43.82 | 0    | 0    | 0    |
| 50.75 | 0    | 0    | 0    |
| 58.77 | 0    | 0    | 0    |
| 68.06 | 0    | 0    | 0    |
| 78.82 | 0    | 0    | 0    |
| 91.28 | 0    | 0    | 0    |
| 105.7 | 0    | 0    | 0    |
| 122.4 | 0    | 0    | 3.1  |
| 141.8 | 7.5  | 0    | 26.4 |
| 164.2 | 28.3 | 9.9  | 40   |
| 190.1 | 37.9 | 30.3 | 25.1 |
| 220.2 | 24   | 37.3 | 0.1  |
| 255   | 2.4  | 21.7 | 0    |
| 295.3 | 0    | 0.8  | 0    |
| 342   | 0    | 0    | 0    |
| 396.1 | 0    | 0    | 0    |
| 458.7 | 0    | 0    | 0    |
| 531.2 | 0    | 0    | 0    |
| 615.1 | 0    | 0    | 0    |
| 712.4 | 0    | 0    | 0    |
| 825   | 0    | 0    | 0    |
| 955.4 | 0    | 0    | 0    |
| 1106  | 0    | 0    | 0    |
| 1281  | 0    | 0    | 0    |
| 1484  | 0    | 0    | 0    |
| 1718  | 0    | 0    | 0    |
| 1990  | 0    | 0    | 0    |
| 2305  | 0    | 0    | 0    |
| 2669  | 0    | 0    | 0    |
| 3091  | 0    | 0    | 0    |
| 3580  | 0    | 0    | 0    |
| 4145  | 0    | 0    | 0    |
| 4801  | 0    | 0    | 0    |
| 5560  | 0    | 0    | 0    |
| 6439  | 0    | 0    | 0    |
| 7456  | 0    | 0    | 0    |
| 8635  | 0    | 0    | 0    |
| 10000 | 0    | 0    | 0    |

#### 4.A.1.3 PPAD-RAL

|        |      |      |      |
|--------|------|------|------|
| 0.4    | 0    | 0    | 0    |
| 0.4632 | 0    | 0    | 0    |
| 0.5365 | 0    | 0    | 0    |
| 0.6213 | 0    | 0    | 0    |
| 0.7195 | 0    | 0    | 0    |
| 0.8332 | 0    | 0    | 0    |
| 0.9649 | 0    | 0    | 0    |
| 1.117  | 0    | 0    | 0    |
| 1.294  | 0    | 0    | 0    |
| 1.499  | 0    | 0    | 0    |
| 1.736  | 0    | 0    | 0    |
| 2.01   | 0    | 0    | 0    |
| 2.328  | 0    | 0    | 0    |
| 2.696  | 0    | 0    | 0    |
| 3.122  | 0    | 0    | 0    |
| 3.615  | 0    | 0    | 0    |
| 4.187  | 0    | 0    | 0    |
| 4.849  | 0    | 0    | 0    |
| 5.615  | 0    | 0    | 0    |
| 6.503  | 0    | 0    | 0    |
| 7.531  | 0    | 0    | 0    |
| 8.721  | 0    | 0    | 0    |
| 10.1   | 0    | 0    | 0    |
| 11.7   | 0    | 0    | 0    |
| 13.54  | 0    | 0    | 0    |
| 15.69  | 0    | 2.1  | 0    |
| 18.17  | 0    | 3    | 0    |
| 21.04  | 0    | 1.5  | 0    |
| 24.36  | 0    | 0    | 0    |
| 28.21  | 0    | 0    | 0    |
| 32.67  | 0    | 0    | 0    |
| 37.84  | 0    | 0    | 0    |
| 43.82  | 0    | 0    | 0    |
| 50.75  | 0    | 0    | 0    |
| 58.77  | 0    | 0    | 0    |
| 68.06  | 0    | 0    | 0    |
| 78.82  | 0    | 0    | 0    |
| 91.28  | 0    | 0    | 0    |
| 105.7  | 0    | 0    | 0    |
| 122.4  | 0    | 0    | 0    |
| 141.8  | 0    | 0    | 0    |
| 164.2  | 0    | 0    | 0    |
| 190.1  | 0    | 0    | 7    |
| 220.2  | 19.2 | 0    | 56.2 |
| 255    | 45.1 | 14.4 | 36.8 |
| 295.3  | 34.8 | 31.8 | 0    |
| 342    | 0.9  | 32.3 | 0    |
| 396.1  | 0    | 14.9 | 0    |
| 458.7  | 0    | 0    | 0    |
| 531.2  | 0    | 0    | 0    |
| 615.1  | 0    | 0    | 0    |
| 712.4  | 0    | 0    | 0    |
| 825    | 0    | 0    | 0    |
| 955.4  | 0    | 0    | 0    |
| 1106   | 0    | 0    | 0    |
| 1281   | 0    | 0    | 0    |
| 1484   | 0    | 0    | 0    |
| 1718   | 0    | 0    | 0    |

|       |   |   |   |
|-------|---|---|---|
| 1990  | 0 | 0 | 0 |
| 2305  | 0 | 0 | 0 |
| 2669  | 0 | 0 | 0 |
| 3091  | 0 | 0 | 0 |
| 3580  | 0 | 0 | 0 |
| 4145  | 0 | 0 | 0 |
| 4801  | 0 | 0 | 0 |
| 5560  | 0 | 0 | 0 |
| 6439  | 0 | 0 | 0 |
| 7456  | 0 | 0 | 0 |
| 8635  | 0 | 0 | 0 |
| 10000 | 0 | 0 | 0 |

#### 4.A.1.4 PPAD-RAL-12M

|        |   |     |     |
|--------|---|-----|-----|
| 0.4    | 0 | 0   | 0   |
| 0.4632 | 0 | 0   | 0   |
| 0.5365 | 0 | 0   | 0   |
| 0.6213 | 0 | 0   | 0   |
| 0.7195 | 0 | 0   | 0   |
| 0.8332 | 0 | 0   | 0   |
| 0.9649 | 0 | 0   | 0   |
| 1.117  | 0 | 0   | 0   |
| 1.294  | 0 | 0   | 0   |
| 1.499  | 0 | 0   | 0   |
| 1.736  | 0 | 0   | 0   |
| 2.01   | 0 | 0   | 0   |
| 2.328  | 0 | 0   | 0   |
| 2.696  | 0 | 0   | 0   |
| 3.122  | 0 | 0   | 0   |
| 3.615  | 0 | 0   | 0   |
| 4.187  | 0 | 0   | 0   |
| 4.849  | 0 | 0   | 0   |
| 5.615  | 0 | 0   | 0   |
| 6.503  | 0 | 0   | 0   |
| 7.531  | 0 | 0   | 2.1 |
| 8.721  | 0 | 0   | 3.5 |
| 10.1   | 0 | 0   | 2.2 |
| 11.7   | 0 | 0   | 0   |
| 13.54  | 0 | 0   | 0   |
| 15.69  | 0 | 0   | 0   |
| 18.17  | 0 | 0   | 0   |
| 21.04  | 0 | 0   | 0   |
| 24.36  | 0 | 0   | 0   |
| 28.21  | 0 | 0   | 0   |
| 32.67  | 0 | 0   | 0   |
| 37.84  | 0 | 0   | 0   |
| 43.82  | 0 | 0   | 0   |
| 50.75  | 0 | 0   | 0   |
| 58.77  | 0 | 0   | 0   |
| 68.06  | 0 | 0   | 0   |
| 78.82  | 0 | 0   | 0   |
| 91.28  | 0 | 0   | 0   |
| 105.7  | 0 | 0   | 0   |
| 122.4  | 0 | 0   | 0   |
| 141.8  | 0 | 0   | 0   |
| 164.2  | 0 | 2.3 | 0   |
| 190.1  | 0 | 17  | 0   |

|       |      |      |      |
|-------|------|------|------|
| 220.2 | 7    | 31.2 | 0    |
| 255   | 19.2 | 31.4 | 5.3  |
| 295.3 | 27.9 | 16.9 | 16   |
| 342   | 26.5 | 1.3  | 24.6 |
| 396.1 | 15.7 | 0    | 24.8 |
| 458.7 | 3.8  | 0    | 16.2 |
| 531.2 | 0    | 0    | 5.2  |
| 615.1 | 0    | 0    | 0    |
| 712.4 | 0    | 0    | 0    |
| 825   | 0    | 0    | 0    |
| 955.4 | 0    | 0    | 0    |
| 1106  | 0    | 0    | 0    |
| 1281  | 0    | 0    | 0    |
| 1484  | 0    | 0    | 0    |
| 1718  | 0    | 0    | 0    |
| 1990  | 0    | 0    | 0    |
| 2305  | 0    | 0    | 0    |
| 2669  | 0    | 0    | 0    |
| 3091  | 0    | 0    | 0    |
| 3580  | 0    | 0    | 0    |
| 4145  | 0    | 0    | 0    |
| 4801  | 0    | 0    | 0    |
| 5560  | 0    | 0    | 0    |
| 6439  | 0    | 0    | 0    |
| 7456  | 0    | 0    | 0    |
| 8635  | 0    | 0    | 0    |
| 10000 | 0    | 0    | 0    |

#### 4.A.1.5 PPAD-AIE-2M

|        |   |   |   |
|--------|---|---|---|
| 0.4    | 0 | 0 | 0 |
| 0.4632 | 0 | 0 | 0 |
| 0.5365 | 0 | 0 | 0 |
| 0.6213 | 0 | 0 | 0 |
| 0.7195 | 0 | 0 | 0 |
| 0.8332 | 0 | 0 | 0 |
| 0.9649 | 0 | 0 | 0 |
| 1.117  | 0 | 0 | 0 |
| 1.294  | 0 | 0 | 0 |
| 1.499  | 0 | 0 | 0 |
| 1.736  | 0 | 0 | 0 |
| 2.01   | 0 | 0 | 0 |
| 2.328  | 0 | 0 | 0 |
| 2.696  | 0 | 0 | 0 |
| 3.122  | 0 | 0 | 0 |
| 3.615  | 0 | 0 | 0 |
| 4.187  | 0 | 0 | 0 |
| 4.849  | 0 | 0 | 0 |
| 5.615  | 0 | 0 | 0 |
| 6.503  | 0 | 0 | 0 |
| 7.531  | 0 | 0 | 0 |
| 8.721  | 0 | 0 | 0 |
| 10.1   | 0 | 0 | 0 |
| 11.7   | 0 | 0 | 0 |
| 13.54  | 0 | 0 | 0 |
| 15.69  | 0 | 0 | 0 |
| 18.17  | 0 | 0 | 0 |
| 21.04  | 0 | 0 | 0 |

|       |      |      |      |
|-------|------|------|------|
| 24.36 | 0    | 0    | 0    |
| 28.21 | 0    | 0    | 0    |
| 32.67 | 0    | 0    | 0    |
| 37.84 | 0    | 0    | 0    |
| 43.82 | 0    | 0    | 0    |
| 50.75 | 0    | 0    | 0    |
| 58.77 | 0    | 0    | 0    |
| 68.06 | 0    | 0    | 0    |
| 78.82 | 0    | 0    | 0    |
| 91.28 | 0    | 0    | 0    |
| 105.7 | 0    | 0    | 0    |
| 122.4 | 0    | 0    | 0    |
| 141.8 | 0    | 0    | 0    |
| 164.2 | 0    | 0    | 0    |
| 190.1 | 0    | 0    | 0    |
| 220.2 | 0    | 0    | 0    |
| 255   | 0    | 0    | 0    |
| 295.3 | 0    | 0    | 0    |
| 342   | 0    | 0    | 0    |
| 396.1 | 0    | 0    | 0    |
| 458.7 | 0    | 0    | 0    |
| 531.2 | 0    | 0    | 0    |
| 615.1 | 0    | 0    | 0    |
| 712.4 | 0    | 0    | 0    |
| 825   | 0    | 0    | 10   |
| 955.4 | 0    | 12.4 | 34.4 |
| 1106  | 11.8 | 33.2 | 38.3 |
| 1281  | 32.9 | 36.3 | 17.4 |
| 1484  | 36.6 | 18.1 | 0    |
| 1718  | 18.7 | 0    | 0    |
| 1990  | 0    | 0    | 0    |
| 2305  | 0    | 0    | 0    |
| 2669  | 0    | 0    | 0    |
| 3091  | 0    | 0    | 0    |
| 3580  | 0    | 0    | 0    |
| 4145  | 0    | 0    | 0    |
| 4801  | 0    | 0    | 0    |
| 5560  | 0    | 0    | 0    |
| 6439  | 0    | 0    | 0    |
| 7456  | 0    | 0    | 0    |
| 8635  | 0    | 0    | 0    |
| 10000 | 0    | 0    | 0    |

#### 4.A.1.6 PPAD-AIE-12M

|        |   |     |     |
|--------|---|-----|-----|
| 0.4    | 0 | 0   | 0   |
| 0.4632 | 0 | 0   | 0   |
| 0.5365 | 0 | 0   | 0   |
| 0.6213 | 0 | 5.6 | 2.6 |
| 0.7195 | 0 | 5.9 | 2.2 |
| 0.8332 | 0 | 5.5 | 1.5 |
| 0.9649 | 0 | 4.4 | 0.7 |
| 1.117  | 0 | 3   | 0.2 |
| 1.294  | 0 | 1.5 | 0   |
| 1.499  | 0 | 0.5 | 0   |
| 1.736  | 0 | 0   | 0   |
| 2.01   | 0 | 0   | 0   |
| 2.328  | 0 | 0   | 0   |

|       |      |      |      |
|-------|------|------|------|
| 2.696 | 0    | 0    | 0    |
| 3.122 | 0    | 0    | 0    |
| 3.615 | 0    | 0    | 0    |
| 4.187 | 0    | 0    | 0    |
| 4.849 | 0    | 0    | 0    |
| 5.615 | 0    | 0    | 0    |
| 6.503 | 0    | 0    | 0    |
| 7.531 | 0    | 0    | 0    |
| 8.721 | 0    | 0    | 0    |
| 10.1  | 0    | 0    | 0    |
| 11.7  | 0    | 0    | 0    |
| 13.54 | 0    | 0    | 0    |
| 15.69 | 0    | 0    | 0    |
| 18.17 | 0    | 0    | 0    |
| 21.04 | 0    | 0    | 0    |
| 24.36 | 0    | 0    | 0    |
| 28.21 | 0    | 0    | 0    |
| 32.67 | 0    | 0    | 0    |
| 37.84 | 0    | 0    | 0    |
| 43.82 | 0    | 0    | 0    |
| 50.75 | 0    | 0    | 0    |
| 58.77 | 0    | 0    | 0    |
| 68.06 | 0    | 0    | 0    |
| 78.82 | 0    | 0    | 0    |
| 91.28 | 0    | 0    | 0    |
| 105.7 | 0    | 0    | 0    |
| 122.4 | 0    | 0    | 0    |
| 141.8 | 0    | 0    | 0    |
| 164.2 | 0    | 0    | 0    |
| 190.1 | 0    | 0    | 0    |
| 220.2 | 0    | 0    | 0    |
| 255   | 0    | 0    | 0    |
| 295.3 | 0    | 0    | 0    |
| 342   | 0    | 0    | 0    |
| 396.1 | 0    | 0    | 0    |
| 458.7 | 0    | 0    | 0    |
| 531.2 | 0    | 0    | 0    |
| 615.1 | 0    | 0    | 0    |
| 712.4 | 0    | 0    | 0    |
| 825   | 0    | 0    | 0    |
| 955.4 | 0    | 0    | 0    |
| 1106  | 0    | 0    | 0    |
| 1281  | 0    | 0    | 0    |
| 1484  | 0    | 0    | 0    |
| 1718  | 0    | 0    | 0    |
| 1990  | 0    | 0    | 0    |
| 2305  | 0    | 0    | 0    |
| 2669  | 0    | 0    | 0    |
| 3091  | 0    | 0    | 2.7  |
| 3580  | 0    | 3.4  | 9    |
| 4145  | 0    | 11.8 | 18.1 |
| 4801  | 23.7 | 23.5 | 27.8 |
| 5560  | 76.3 | 34.9 | 35.3 |
| 6439  | 0    | 0    | 0    |
| 7456  | 0    | 0    | 0    |
| 8635  | 0    | 0    | 0    |
| 10000 | 0    | 0    | 0    |



#### 4.A.1.7 PPAD-LITFSI

|        |      |     |     |
|--------|------|-----|-----|
| 0.4    | 0    | 0   | 0   |
| 0.4632 | 0    | 0   | 0   |
| 0.5365 | 0    | 0   | 0   |
| 0.6213 | 0    | 0   | 0   |
| 0.7195 | 0    | 0   | 0   |
| 0.8332 | 0    | 0   | 0   |
| 0.9649 | 0    | 0   | 0   |
| 1.117  | 0    | 0   | 0   |
| 1.294  | 0    | 0   | 0   |
| 1.499  | 0    | 0   | 0   |
| 1.736  | 0.9  | 0   | 0   |
| 2.01   | 2.9  | 0   | 0   |
| 2.328  | 3.4  | 0   | 0   |
| 2.696  | 1.8  | 0   | 0   |
| 3.122  | 0    | 0   | 0   |
| 3.615  | 0    | 0   | 0   |
| 4.187  | 0    | 0   | 0   |
| 4.849  | 0    | 0   | 0   |
| 5.615  | 0    | 0   | 0   |
| 6.503  | 0    | 0   | 0   |
| 7.531  | 0    | 0   | 0   |
| 8.721  | 0    | 0   | 0   |
| 10.1   | 0    | 0   | 0   |
| 11.7   | 0    | 0   | 0   |
| 13.54  | 0    | 0   | 0   |
| 15.69  | 0    | 0   | 0   |
| 18.17  | 0    | 0   | 0   |
| 21.04  | 0    | 0   | 0   |
| 24.36  | 0    | 0   | 0   |
| 28.21  | 0    | 0   | 0   |
| 32.67  | 0    | 0   | 0   |
| 37.84  | 0    | 0   | 0   |
| 43.82  | 0    | 0   | 0   |
| 50.75  | 0    | 0   | 0   |
| 58.77  | 0    | 0   | 0   |
| 68.06  | 0    | 0   | 0   |
| 78.82  | 0    | 0   | 0   |
| 91.28  | 0    | 0   | 0   |
| 105.7  | 0    | 0   | 0   |
| 122.4  | 0.7  | 0   | 0   |
| 141.8  | 13.7 | 0   | 0   |
| 164.2  | 27.7 | 0   | 0   |
| 190.1  | 29.4 | 0   | 0   |
| 220.2  | 17   | 0   | 0   |
| 255    | 2.5  | 0.6 | 1.1 |
| 295.3  | 0    | 3.4 | 3.3 |
| 342    | 0    | 7.1 | 5.4 |
| 396.1  | 0    | 9.4 | 6.2 |
| 458.7  | 0    | 9.1 | 5.2 |
| 531.2  | 0    | 6.2 | 3   |
| 615.1  | 0    | 2.5 | 0.9 |
| 712.4  | 0    | 0   | 0   |
| 825    | 0    | 0   | 0   |
| 955.4  | 0    | 0   | 0   |
| 1106   | 0    | 0   | 0   |
| 1281   | 0    | 0   | 0   |

|       |   |      |      |
|-------|---|------|------|
| 1484  | 0 | 0    | 0    |
| 1718  | 0 | 0    | 0    |
| 1990  | 0 | 0    | 0    |
| 2305  | 0 | 0    | 0    |
| 2669  | 0 | 0    | 0    |
| 3091  | 0 | 0    | 0    |
| 3580  | 0 | 0    | 0    |
| 4145  | 0 | 3.8  | 7.5  |
| 4801  | 0 | 18.1 | 23.7 |
| 5560  | 0 | 39.7 | 43.6 |
| 6439  | 0 | 0    | 0    |
| 7456  | 0 | 0    | 0    |
| 8635  | 0 | 0    | 0    |
| 10000 | 0 | 0    | 0    |

#### **4.A.1.8 PPAD-LITFSI-RAL**

|        |   |     |   |
|--------|---|-----|---|
| 0.4    | 0 | 0   | 0 |
| 0.4632 | 0 | 0   | 0 |
| 0.5365 | 0 | 0   | 0 |
| 0.6213 | 0 | 0   | 0 |
| 0.7195 | 0 | 0   | 0 |
| 0.8332 | 0 | 0   | 0 |
| 0.9649 | 0 | 0   | 0 |
| 1.117  | 0 | 0   | 0 |
| 1.294  | 0 | 0   | 0 |
| 1.499  | 0 | 0   | 0 |
| 1.736  | 0 | 0   | 0 |
| 2.01   | 0 | 0   | 0 |
| 2.328  | 0 | 0   | 0 |
| 2.696  | 0 | 0   | 0 |
| 3.122  | 0 | 0   | 0 |
| 3.615  | 0 | 0   | 0 |
| 4.187  | 0 | 0   | 0 |
| 4.849  | 0 | 0   | 0 |
| 5.615  | 0 | 0   | 0 |
| 6.503  | 0 | 0   | 0 |
| 7.531  | 0 | 0   | 0 |
| 8.721  | 0 | 0   | 0 |
| 10.1   | 0 | 0   | 0 |
| 11.7   | 0 | 0   | 0 |
| 13.54  | 0 | 0   | 0 |
| 15.69  | 0 | 1.1 | 0 |
| 18.17  | 0 | 2.6 | 0 |
| 21.04  | 0 | 1.8 | 0 |
| 24.36  | 0 | 0   | 0 |
| 28.21  | 0 | 0   | 0 |
| 32.67  | 0 | 0   | 0 |
| 37.84  | 0 | 0   | 0 |
| 43.82  | 0 | 0   | 0 |
| 50.75  | 0 | 0   | 0 |
| 58.77  | 0 | 0   | 0 |
| 68.06  | 0 | 0   | 0 |
| 78.82  | 0 | 0   | 0 |
| 91.28  | 0 | 0   | 0 |
| 105.7  | 0 | 0   | 0 |
| 122.4  | 0 | 0   | 0 |
| 141.8  | 0 | 0   | 0 |

|       |      |      |      |
|-------|------|------|------|
| 164.2 | 0    | 0    | 0    |
| 190.1 | 0    | 0    | 0    |
| 220.2 | 0    | 0    | 0    |
| 255   | 0    | 0    | 0    |
| 295.3 | 0    | 0    | 0    |
| 342   | 0    | 0    | 0    |
| 396.1 | 0    | 0    | 0    |
| 458.7 | 0    | 0    | 0    |
| 531.2 | 0    | 0    | 0    |
| 615.1 | 7.2  | 0    | 0    |
| 712.4 | 83.1 | 0    | 0    |
| 825   | 9.7  | 0    | 0    |
| 955.4 | 0    | 18.7 | 0    |
| 1106  | 0    | 43.3 | 9.2  |
| 1281  | 0    | 32.4 | 33.6 |
| 1484  | 0    | 0    | 38.9 |
| 1718  | 0    | 0    | 18.3 |
| 1990  | 0    | 0    | 0    |
| 2305  | 0    | 0    | 0    |
| 2669  | 0    | 0    | 0    |
| 3091  | 0    | 0    | 0    |
| 3580  | 0    | 0    | 0    |
| 4145  | 0    | 0    | 0    |
| 4801  | 0    | 0    | 0    |
| 5560  | 0    | 0    | 0    |
| 6439  | 0    | 0    | 0    |
| 7456  | 0    | 0    | 0    |
| 8635  | 0    | 0    | 0    |
| 10000 | 0    | 0    | 0    |

#### 4.A.1.9 PPAD-LiTFSI-RAL-12M

|        |   |   |   |
|--------|---|---|---|
| 0.4    | 0 | 0 | 0 |
| 0.4632 | 0 | 0 | 0 |
| 0.5365 | 0 | 0 | 0 |
| 0.6213 | 0 | 0 | 0 |
| 0.7195 | 0 | 0 | 0 |
| 0.8332 | 0 | 0 | 0 |
| 0.9649 | 0 | 0 | 0 |
| 1.117  | 0 | 0 | 0 |
| 1.294  | 0 | 0 | 0 |
| 1.499  | 0 | 0 | 0 |
| 1.736  | 0 | 0 | 0 |
| 2.01   | 0 | 0 | 0 |
| 2.328  | 0 | 0 | 0 |
| 2.696  | 0 | 0 | 0 |
| 3.122  | 0 | 0 | 0 |
| 3.615  | 0 | 0 | 0 |
| 4.187  | 0 | 0 | 0 |
| 4.849  | 0 | 0 | 0 |
| 5.615  | 0 | 0 | 0 |
| 6.503  | 0 | 0 | 0 |
| 7.531  | 0 | 0 | 0 |
| 8.721  | 0 | 0 | 0 |
| 10.1   | 0 | 0 | 0 |
| 11.7   | 0 | 0 | 0 |
| 13.54  | 0 | 0 | 0 |
| 15.69  | 0 | 0 | 0 |

|       |      |      |      |
|-------|------|------|------|
| 18.17 | 0    | 0    | 0    |
| 21.04 | 0    | 0    | 0    |
| 24.36 | 0    | 0    | 0    |
| 28.21 | 0    | 0    | 0    |
| 32.67 | 0    | 0    | 0    |
| 37.84 | 0    | 0    | 0    |
| 43.82 | 0    | 0    | 0    |
| 50.75 | 0    | 0    | 0    |
| 58.77 | 0    | 0    | 0    |
| 68.06 | 0    | 0    | 0    |
| 78.82 | 0    | 0    | 0    |
| 91.28 | 0    | 0.8  | 0    |
| 105.7 | 0    | 1.9  | 0    |
| 122.4 | 1.1  | 2.2  | 0    |
| 141.8 | 2.5  | 1.3  | 0    |
| 164.2 | 2.6  | 0.2  | 0    |
| 190.1 | 1.2  | 0    | 0    |
| 220.2 | 0    | 0    | 0    |
| 255   | 0    | 0    | 0    |
| 295.3 | 0    | 0    | 0    |
| 342   | 0    | 0    | 0    |
| 396.1 | 0    | 0    | 0    |
| 458.7 | 0    | 0    | 0    |
| 531.2 | 0    | 0    | 0    |
| 615.1 | 0    | 3.8  | 0    |
| 712.4 | 6.3  | 12.6 | 3.4  |
| 825   | 16.9 | 21.5 | 15.1 |
| 955.4 | 24.7 | 24.7 | 26.7 |
| 1106  | 24.2 | 19.7 | 28.9 |
| 1281  | 15.6 | 9.8  | 19.6 |
| 1484  | 4.9  | 1.5  | 6.4  |
| 1718  | 0    | 0    | 0    |
| 1990  | 0    | 0    | 0    |
| 2305  | 0    | 0    | 0    |
| 2669  | 0    | 0    | 0    |
| 3091  | 0    | 0    | 0    |
| 3580  | 0    | 0    | 0    |
| 4145  | 0    | 0    | 0    |
| 4801  | 0    | 0    | 0    |
| 5560  | 0    | 0    | 0    |
| 6439  | 0    | 0    | 0    |
| 7456  | 0    | 0    | 0    |
| 8635  | 0    | 0    | 0    |
| 10000 | 0    | 0    | 0    |

#### 4.A.1.10 PPAD-LiTFSI-2M

|        |   |   |   |
|--------|---|---|---|
| 0.4    | 0 | 0 | 0 |
| 0.4632 | 0 | 0 | 0 |
| 0.5365 | 0 | 0 | 0 |
| 0.6213 | 0 | 0 | 0 |
| 0.7195 | 0 | 0 | 0 |
| 0.8332 | 0 | 0 | 0 |
| 0.9649 | 0 | 0 | 0 |
| 1.117  | 0 | 0 | 0 |
| 1.294  | 0 | 0 | 0 |
| 1.499  | 0 | 0 | 0 |
| 1.736  | 0 | 0 | 0 |

|       |      |      |      |
|-------|------|------|------|
| 2.01  | 0    | 0    | 0    |
| 2.328 | 0    | 0    | 0    |
| 2.696 | 0    | 0    | 0    |
| 3.122 | 0    | 0    | 0    |
| 3.615 | 0    | 0    | 0    |
| 4.187 | 0    | 0    | 0    |
| 4.849 | 0    | 0    | 0    |
| 5.615 | 0    | 0    | 0    |
| 6.503 | 0    | 0    | 0    |
| 7.531 | 0    | 0    | 0    |
| 8.721 | 0    | 0    | 0    |
| 10.1  | 0    | 0    | 0    |
| 11.7  | 0    | 0    | 0    |
| 13.54 | 0    | 0    | 0    |
| 15.69 | 0    | 0    | 0    |
| 18.17 | 0    | 0    | 0    |
| 21.04 | 0    | 0    | 0    |
| 24.36 | 0    | 0    | 0    |
| 28.21 | 0    | 0    | 0    |
| 32.67 | 0    | 0    | 0    |
| 37.84 | 0    | 0    | 0    |
| 43.82 | 0    | 0    | 0    |
| 50.75 | 0    | 0    | 0    |
| 58.77 | 0    | 0    | 0    |
| 68.06 | 0    | 0    | 0    |
| 78.82 | 0    | 0    | 0    |
| 91.28 | 0    | 0    | 0    |
| 105.7 | 0    | 0    | 0    |
| 122.4 | 0    | 0    | 0    |
| 141.8 | 0    | 0    | 0    |
| 164.2 | 0    | 0    | 0    |
| 190.1 | 0    | 0    | 0    |
| 220.2 | 0    | 0    | 0    |
| 255   | 0    | 0    | 0    |
| 295.3 | 0    | 0    | 0    |
| 342   | 0    | 0    | 0    |
| 396.1 | 0    | 0    | 0    |
| 458.7 | 0    | 0    | 0    |
| 531.2 | 0    | 0    | 0    |
| 615.1 | 0    | 0    | 0    |
| 712.4 | 0    | 0    | 0    |
| 825   | 0    | 0    | 0    |
| 955.4 | 0    | 0    | 0    |
| 1106  | 0    | 0    | 0    |
| 1281  | 0    | 0    | 30   |
| 1484  | 0    | 0    | 53.7 |
| 1718  | 0    | 0    | 16.4 |
| 1990  | 7.9  | 31.5 | 0    |
| 2305  | 35.8 | 44.8 | 0    |
| 2669  | 39.8 | 23.7 | 0    |
| 3091  | 16.5 | 0    | 0    |
| 3580  | 0    | 0    | 0    |
| 4145  | 0    | 0    | 0    |
| 4801  | 0    | 0    | 0    |
| 5560  | 0    | 0    | 0    |
| 6439  | 0    | 0    | 0    |
| 7456  | 0    | 0    | 0    |
| 8635  | 0    | 0    | 0    |

|       |   |   |   |
|-------|---|---|---|
| 10000 | 0 | 0 | 0 |
|-------|---|---|---|

#### 4.A.1.11 PPAD-LiTFSl-12M

|        |     |     |     |
|--------|-----|-----|-----|
| 0.4    | 0   | 0   | 0   |
| 0.4632 | 0   | 0   | 0   |
| 0.5365 | 0   | 0   | 0   |
| 0.6213 | 4.3 | 0   | 2.3 |
| 0.7195 | 3.2 | 0   | 1.9 |
| 0.8332 | 1.7 | 0   | 1.2 |
| 0.9649 | 0.6 | 0   | 0.5 |
| 1.117  | 0   | 0   | 0.1 |
| 1.294  | 0   | 0   | 0   |
| 1.499  | 0   | 0   | 0   |
| 1.736  | 0   | 0   | 0   |
| 2.01   | 0   | 0   | 0   |
| 2.328  | 0   | 0   | 0   |
| 2.696  | 0   | 0   | 0   |
| 3.122  | 0   | 0   | 0   |
| 3.615  | 0   | 0   | 0   |
| 4.187  | 0   | 0   | 0   |
| 4.849  | 0   | 0   | 0   |
| 5.615  | 0   | 0   | 0   |
| 6.503  | 0   | 0   | 0   |
| 7.531  | 0   | 0   | 0   |
| 8.721  | 0   | 0   | 0   |
| 10.1   | 0   | 0   | 0   |
| 11.7   | 0   | 0   | 0   |
| 13.54  | 0   | 0   | 0   |
| 15.69  | 0   | 0   | 0   |
| 18.17  | 0   | 0   | 0   |
| 21.04  | 0   | 0   | 0   |
| 24.36  | 0   | 0   | 0   |
| 28.21  | 0   | 0   | 0   |
| 32.67  | 0   | 0   | 0   |
| 37.84  | 0   | 0   | 0   |
| 43.82  | 0   | 0   | 0   |
| 50.75  | 0   | 0   | 0   |
| 58.77  | 0   | 0   | 0   |
| 68.06  | 0   | 0   | 0   |
| 78.82  | 0   | 0   | 0   |
| 91.28  | 0   | 0   | 0   |
| 105.7  | 0   | 0   | 0   |
| 122.4  | 0   | 0   | 0   |
| 141.8  | 0   | 0   | 0.2 |
| 164.2  | 0   | 0.4 | 0.7 |
| 190.1  | 0   | 0.9 | 1.1 |
| 220.2  | 0   | 1.4 | 1.4 |
| 255    | 0   | 1.6 | 1.4 |
| 295.3  | 0   | 1.5 | 1.2 |
| 342    | 0   | 1   | 0.8 |
| 396.1  | 0   | 0.5 | 0.4 |
| 458.7  | 0   | 0.1 | 0.1 |
| 531.2  | 0   | 0   | 0   |
| 615.1  | 0   | 0   | 0   |
| 712.4  | 0   | 0   | 0   |
| 825    | 0   | 0   | 0   |
| 955.4  | 0   | 0   | 0   |

|       |      |      |      |
|-------|------|------|------|
| 1106  | 0    | 0    | 0    |
| 1281  | 0    | 0    | 0    |
| 1484  | 0    | 0    | 0    |
| 1718  | 0    | 0    | 0    |
| 1990  | 0    | 0    | 0    |
| 2305  | 0    | 0    | 1    |
| 2669  | 0    | 1.3  | 3.5  |
| 3091  | 0.5  | 5    | 7.5  |
| 3580  | 5.6  | 11.2 | 12.4 |
| 4145  | 15.8 | 18.6 | 17.4 |
| 4801  | 28.5 | 25.8 | 21.5 |
| 5560  | 39.9 | 30.6 | 23.6 |
| 6439  | 0    | 0    | 0    |
| 7456  | 0    | 0    | 0    |
| 8635  | 0    | 0    | 0    |
| 10000 | 0    | 0    | 0    |

## 4.A.2. Zeta Potential Analysis

### 4.A.2.1 PPAD-BIE

|       |           |       |           |       |            |
|-------|-----------|-------|-----------|-------|------------|
| -147  | 24553.166 | -148  | 14619.332 | -149  | 0          |
| -144  | 23540.406 | -145  | 20287.078 | -146  | 0          |
| -141  | 20720.266 | -141  | 22563.041 | -142  | 0          |
| -137  | 19521.254 | -138  | 19749.658 | -139  | 0          |
| -134  | 17066.543 | -135  | 14531.653 | -135  | 0          |
| -130  | 13482.243 | -131  | 11807.622 | -132  | 0          |
| -127  | 9743.87   | -128  | 10820.009 | -128  | 0          |
| -124  | 7280.23   | -124  | 10489.063 | -125  | 0          |
| -120  | 6373.733  | -121  | 10628.616 | -121  | 0          |
| -117  | 5535.225  | -118  | 11552.854 | -118  | 0          |
| -114  | 4388.019  | -114  | 10506.571 | -114  | 0          |
| -110  | 4866.424  | -111  | 5881.768  | -111  | 0          |
| -107  | 5892.157  | -107  | 2646.346  | -107  | 0          |
| -103  | 6516.428  | -104  | 3017.622  | -104  | 0          |
| -100  | 9386.451  | -101  | 5260      | -100  | 0          |
| -96.6 | 11301.795 | -97.3 | 6318.418  | -96.6 | 0          |
| -93.3 | 10407.668 | -93.9 | 5836.929  | -93.1 | 0          |
| -89.9 | 8900.773  | -90.5 | 7897.781  | -89.6 | 0          |
| -86.5 | 8151.284  | -87.1 | 9985.839  | -86   | 0          |
| -83.1 | 8788.08   | -83.7 | 10245.366 | -82.5 | 0          |
| -79.7 | 8753.906  | -80.4 | 11988.557 | -79   | 0          |
| -76.4 | 10178.915 | -77   | 12602.357 | -75.5 | 0          |
| -73   | 13948.118 | -73.6 | 12152.467 | -72   | 0          |
| -69.6 | 17711.814 | -70.2 | 12217.393 | -68.4 | 0          |
| -66.2 | 20319.779 | -66.8 | 12664.063 | -64.9 | 0          |
| -62.8 | 20798.742 | -63.4 | 12725.408 | -61.4 | 0          |
| -59.5 | 19911.088 | -60   | 14610.667 | -57.9 | 0          |
| -56.1 | 18727.307 | -56.6 | 22883.557 | -54.4 | 0          |
| -52.7 | 21008.064 | -53.3 | 29090.135 | -50.8 | 0          |
| -49.3 | 25793.172 | -49.9 | 29627.742 | -47.3 | 7161.588   |
| -45.9 | 33165.543 | -46.5 | 34303.891 | -43.8 | 47738.859  |
| -42.6 | 44590.313 | -43.1 | 45099.234 | -40.3 | 123127.875 |
| -39.2 | 50312.742 | -39.7 | 56042.922 | -36.8 | 210393.188 |
| -35.8 | 52572.891 | -36.3 | 65911.352 | -33.3 | 312013.063 |
| -32.4 | 65610.922 | -32.9 | 78933.398 | -29.7 | 386034.438 |

|       |            |       |            |       |            |
|-------|------------|-------|------------|-------|------------|
| -29   | 93735.563  | -29.5 | 92052.398  | -26.2 | 363280.375 |
| -25.7 | 132217.578 | -26.1 | 107167     | -22.7 | 257648.844 |
| -22.3 | 157760.984 | -22.8 | 131946.563 | -19.2 | 147951.672 |
| -18.9 | 164391.969 | -19.4 | 170658.641 | -15.7 | 74801.461  |
| -15.5 | 174268     | -16   | 209627.813 | -12.1 | 35865.43   |
| -12.1 | 179628.859 | -12.6 | 208313.984 | -8.62 | 18805.545  |
| -8.76 | 165280.688 | -9.21 | 174002.578 | -5.1  | 16047.803  |
| -5.38 | 141541.688 | -5.82 | 143128.078 | -1.58 | 28976.107  |
| -2    | 122086.563 | -2.43 | 129201.234 | 1.94  | 74193.438  |
| 1.38  | 112724.18  | 0.959 | 134525.047 | 5.46  | 165165.5   |
| 4.76  | 118128.188 | 4.35  | 137261.672 | 8.98  | 265459.344 |
| 8.14  | 126926.711 | 7.74  | 129139.914 | 12.5  | 311079.438 |
| 11.5  | 132570.453 | 11.1  | 120161.477 | 16    | 264220.5   |
| 14.9  | 148705.094 | 14.5  | 120387.313 | 19.5  | 155660.203 |
| 18.3  | 161692.656 | 17.9  | 141386.625 | 23.1  | 59738.527  |
| 21.7  | 167621.016 | 21.3  | 171893.422 | 26.6  | 15578.67   |
| 25    | 173180.188 | 24.7  | 193360.563 | 30.1  | 2093.845   |
| 28.4  | 159442.172 | 28.1  | 201308.813 | 33.6  | 0          |
| 31.8  | 125473.141 | 31.5  | 185444.906 | 37.1  | 0          |
| 35.2  | 96186.016  | 34.8  | 147862.594 | 40.6  | 0          |
| 38.6  | 80688.805  | 38.2  | 113682.617 | 44.2  | 0          |
| 41.9  | 65534.531  | 41.6  | 94883.445  | 47.7  | 0          |
| 45.3  | 50450.434  | 45    | 81147.586  | 51.2  | 0          |
| 48.7  | 40018.207  | 48.4  | 61405.578  | 54.7  | 0          |
| 52.1  | 30797.855  | 51.8  | 45778.961  | 58.2  | 0          |
| 55.5  | 24258.49   | 55.2  | 40596.879  | 61.8  | 0          |
| 58.8  | 20172.137  | 58.6  | 35795.566  | 65.3  | 0          |
| 62.2  | 16927.684  | 61.9  | 29106.617  | 68.8  | 0          |
| 65.6  | 15738.528  | 65.3  | 24175.773  | 72.3  | 0          |
| 69    | 14970.574  | 68.7  | 20730.779  | 75.8  | 0          |
| 72.3  | 13067.628  | 72.1  | 16072.359  | 79.4  | 0          |
| 75.7  | 13434.9    | 75.5  | 11684.252  | 82.9  | 0          |
| 79.1  | 15564.949  | 78.9  | 8644.409   | 86.4  | 0          |
| 82.5  | 12358.007  | 82.3  | 5926.601   | 89.9  | 0          |
| 85.9  | 6077.801   | 85.7  | 4129.644   | 93.4  | 0          |
| 89.2  | 4797.815   | 89.1  | 3115.36    | 97    | 0          |
| 92.6  | 5556.451   | 92.4  | 2284.91    | 100   | 0          |
| 96    | 3416.058   | 95.8  | 1645.748   | 104   | 0          |
| 99.4  | 1619.589   | 99.2  | 1184.204   | 108   | 0          |
| 103   | 1389.067   | 103   | 0          | 111   | 0          |
| 106   | 909.374    | 106   | 0          | 115   | 0          |
| 110   | 672.279    | 109   | 0          | 118   | 0          |
| 113   | 324.551    | 113   | 0          | 122   | 0          |
| 116   | 288.388    | 116   | 0          | 125   | 0          |
| 120   | 2027.139   | 120   | 0          | 129   | 0          |
| 123   | 2918.387   | 123   | 0          | 132   | 0          |
| 126   | 1430.686   | 126   | 0          | 136   | 0          |
| 130   | 0          | 130   | 0          | 139   |            |
| 133   | 0          | 133   | 0          | 143   |            |
| 137   | 0          | 136   | 0          | 146   |            |
| 140   | 0          | 140   | 0          | 150   |            |
| 143   | 0          | 143   | 0          |       |            |
| 147   | 0          | 147   | 0          |       |            |

#### 4.A.2.2 PPAD-AIE

|      |   |      |   |      |   |
|------|---|------|---|------|---|
| -116 | 0 | -113 | 0 | -115 | 0 |
| -112 | 0 | -110 | 0 | -112 | 0 |



|         |           |        |           |       |           |
|---------|-----------|--------|-----------|-------|-----------|
| -109    | 0         | -106   | 0         | -109  | 0         |
| -106    | 0         | -103   | 0         | -105  | 0         |
| -102    | 0         | -99.7  | 0         | -102  | 0         |
| -99.1   | 0         | -96.4  | 0         | -98.7 | 0         |
| -95.8   | 0         | -93.1  | 0         | -95.4 | 0         |
| -92.5   | 0         | -89.8  | 0         | -92.1 | 0         |
| -89.2   | 0         | -86.5  | 0         | -88.8 | 0         |
| -85.9   | 0         | -83.2  | 0         | -85.5 | 0         |
| -82.6   | 0         | -79.9  | 0         | -82.2 | 0         |
| -79.3   | 0         | -76.6  | 0         | -78.9 | 0         |
| -76     | 0         | -73.3  | 0         | -75.6 | 0         |
| -72.7   | 0         | -70    | 0         | -72.3 | 0         |
| -69.4   | 0         | -66.7  | 0         | -69   | 0         |
| -66.1   | 14141.016 | -63.4  | 1100.751  | -65.7 | 0         |
| -62.8   | 44367.824 | -60.1  | 25240.602 | -62.4 | 12634.783 |
| -59.5   | 56440.195 | -56.8  | 62458.832 | -59   | 47724.93  |
| -56.2   | 47733.113 | -53.5  | 72495.258 | -55.7 | 73388.906 |
| -52.9   | 23699.32  | -50.2  | 40787.395 | -52.4 | 52930.559 |
| -49.6   | 4035.668  | -46.9  | 11086.529 | -49.1 | 23102.771 |
| -46.3   | 0         | -43.6  | 1448.901  | -45.8 | 7802.147  |
| -43     | 0         | -40.3  | 0         | -42.5 | 0         |
| -39.7   | 0         | -37    | 0         | -39.2 | 0         |
| -36.4   | 0         | -33.7  | 0         | -35.9 | 0         |
| -33.1   | 0         | -30.4  | 0         | -32.6 | 0         |
| -29.8   | 0         | -27.1  | 0         | -29.3 | 0         |
| -26.5   | 0         | -23.8  | 0         | -26   | 0         |
| -23.2   | 0         | -20.5  | 0         | -22.7 | 0         |
| -19.9   | 0         | -17.2  | 0         | -19.4 | 0         |
| -16.6   | 0         | -13.9  | 0         | -16.1 | 0         |
| -13.3   | 0         | -10.6  | 0         | -12.8 | 0         |
| -9.95   | 0         | -7.25  | 0         | -9.51 | 0         |
| -6.65   | 0         | -3.95  | 0         | -6.2  | 0         |
| -3.35   | 0         | -0.643 | 0         | -2.9  | 0         |
| -0.0466 | 0         | 2.66   | 0         | 0.404 | 0         |
| 3.25    | 0         | 5.96   | 0         | 3.71  | 0         |
| 6.56    | 0         | 9.26   | 0         | 7.01  | 0         |
| 9.86    | 0         | 12.6   | 0         | 10.3  | 0         |
| 13.2    | 0         | 15.9   | 0         | 13.6  | 0         |
| 16.5    | 0         | 19.2   | 0         | 16.9  | 0         |
| 19.8    | 0         | 22.5   | 0         | 20.2  | 0         |
| 23.1    | 0         | 25.8   | 0         | 23.5  | 0         |
| 26.4    | 0         | 29.1   | 0         | 26.8  | 0         |
| 29.7    | 0         | 32.4   | 0         | 30.1  | 0         |
| 33      | 0         | 35.7   | 0         | 33.4  | 0         |
| 36.3    | 0         | 39     | 0         | 36.7  | 0         |
| 39.6    | 0         | 42.3   | 0         | 40    | 0         |
| 42.9    | 0         | 45.6   | 0         | 43.3  | 0         |
| 46.2    | 0         | 48.9   | 0         | 46.6  | 0         |
| 49.5    | 0         | 52.2   | 0         | 49.9  | 0         |
| 52.8    | 0         | 55.5   | 0         | 53.2  | 0         |
| 56.1    | 0         | 58.8   | 0         | 56.6  | 0         |
| 59.4    | 0         | 62.1   | 0         | 59.9  | 0         |
| 62.7    | 0         | 65.4   | 0         | 63.2  | 0         |
| 66      | 0         | 68.7   | 0         | 66.5  | 0         |
| 69.3    | 0         | 72     | 0         | 69.8  | 0         |
| 72.6    | 0         | 75.3   | 0         | 73.1  | 0         |
| 75.9    | 0         | 78.6   | 0         | 76.4  | 0         |
| 79.2    | 0         | 81.9   | 0         | 79.7  | 0         |

|      |           |      |           |      |           |
|------|-----------|------|-----------|------|-----------|
| 82.5 | 0         | 85.2 | 0         | 83   | 0         |
| 85.8 | 0         | 88.5 | 0         | 86.3 | 0         |
| 89.1 | 0         | 91.8 | 0         | 89.6 | 0         |
| 92.4 | 0         | 95.1 | 0         | 92.9 | 0         |
| 95.7 | 0         | 98.4 | 0         | 96.2 | 0         |
| 99   | 0         | 102  | 0         | 99.5 | 0         |
| 102  | 0         | 105  | 0         | 103  | 0         |
| 106  | 0         | 108  | 0         | 106  | 0         |
| 109  | 0         | 112  | 0         | 109  | 0         |
| 112  | 0         | 115  | 0         | 113  | 0         |
| 115  | 0         | 118  | 0         | 116  | 0         |
| 119  | 0         | 122  | 0         | 119  | 0         |
| 122  | 0         | 125  | 0         | 123  | 0         |
| 125  | 0         | 128  | 0         | 126  | 0         |
| 129  | 0         | 131  | 0         | 129  | 0         |
| 132  | 0         | 135  | 0         | 133  | 0         |
| 135  | 0         | 138  | 0         | 136  | 3581.699  |
| 139  | 5498.4    | 141  | 9072.6    | 139  | 14081.344 |
| 142  | 13068.521 | 145  | 19577.543 | 142  | 21401.818 |
| 145  | 15557.294 | 148  | 17046.389 | 146  | 12314.094 |
| 149  | 12652.614 | --   | --        | 149  | 497.615   |

#### 4.A.2.3 PPAD-RAL

|       |           |       |           |       |           |
|-------|-----------|-------|-----------|-------|-----------|
| -148  | 0         | -149  | 0         | -147  | 0         |
| -145  | 0         | -145  | 0         | -143  | 0         |
| -142  | 0         | -141  | 0         | -140  | 0         |
| -138  | 0         | -137  | 0         | -136  | 0         |
| -135  | 0         | -134  | 0         | -133  | 0         |
| -131  | 0         | -130  | 0         | -129  | 0         |
| -128  | 0         | -126  | 0         | -125  | 0         |
| -124  | 0         | -123  | 0         | -122  | 0         |
| -121  | 0         | -119  | 0         | -118  | 0         |
| -118  | 0         | -115  | 0         | -115  | 0         |
| -114  | 0         | -111  | 0         | -111  | 0         |
| -111  | 0         | -108  | 0         | -108  | 0         |
| -107  | 0         | -104  | 0         | -104  | 0         |
| -104  | 0         | -100  | 0         | -100  | 0         |
| -101  | 0         | -96.6 | 0         | -96.9 | 0         |
| -97.1 | 0         | -92.9 | 0         | -93.3 | 0         |
| -93.7 | 0         | -89.2 | 0         | -89.7 | 0         |
| -90.3 | 0         | -85.5 | 0         | -86.2 | 0         |
| -86.8 | 0         | -81.8 | 0         | -82.6 | 0         |
| -83.4 | 0         | -78.1 | 0         | -79   | 0         |
| -80   | 0         | -74.3 | 1021.42   | -75.5 | 0         |
| -76.6 | 0         | -70.6 | 3970.318  | -71.9 | 0         |
| -73.2 | 0         | -66.9 | 9084.563  | -68.3 | 1469.656  |
| -69.7 | 0         | -63.2 | 18241.51  | -64.8 | 5137.91   |
| -66.3 | 0         | -59.5 | 29804.332 | -61.2 | 11455.906 |
| -62.9 | 0         | -55.8 | 38736.184 | -57.6 | 20831.229 |
| -59.5 | 2111.881  | -52.1 | 42105.215 | -54.1 | 37330.184 |
| -56.1 | 6909.895  | -48.4 | 38613.598 | -50.5 | 55857.777 |
| -52.6 | 13429.454 | -44.7 | 34606.891 | -47   | 59361.641 |
| -49.2 | 21866.148 | -41   | 29456.545 | -43.4 | 51612.664 |
| -45.8 | 34829.371 | -37.3 | 19838.49  | -39.8 | 46545.082 |
| -42.4 | 48555.66  | -33.6 | 10264.017 | -36.3 | 38232.352 |
| -38.9 | 49100.84  | -29.8 | 4773.774  | -32.7 | 24324.365 |
| -35.5 | 41863.07  | -26.1 | 2642.53   | -29.1 | 12714.841 |

|       |           |        |          |        |          |
|-------|-----------|--------|----------|--------|----------|
| -32.1 | 35014.094 | -22.4  | 2355.289 | -25.6  | 4784.354 |
| -28.7 | 23742.596 | -18.7  | 1924.773 | -22    | 267.112  |
| -25.3 | 11160.742 | -15    | 390.839  | -18.4  | 0        |
| -21.8 | 4048.823  | -11.3  | 0        | -14.9  | 0        |
| -18.4 | 1169.878  | -7.6   | 0        | -11.3  | 0        |
| -15   | 0         | -3.89  | 0        | -7.73  | 0        |
| -11.6 | 0         | -0.185 | 0        | -4.16  | 0        |
| -8.16 | 0         | 3.52   | 0        | -0.594 | 0        |
| -4.74 | 0         | 7.23   | 0        | 2.97   | 0        |
| -1.32 | 0         | 10.9   | 0        | 6.54   | 0        |
| 2.1   | 0         | 14.6   | 0        | 10.1   | 0        |
| 5.52  | 0         | 18.4   | 0        | 13.7   | 0        |
| 8.94  | 0         | 22.1   | 0        | 17.2   | 0        |
| 12.4  | 0         | 25.8   | 0        | 20.8   | 0        |
| 15.8  | 0         | 29.5   | 0        | 24.4   | 0        |
| 19.2  | 0         | 33.2   | 0        | 27.9   | 0        |
| 22.6  | 0         | 36.9   | 0        | 31.5   | 0        |
| 26    | 0         | 40.6   | 0        | 35.1   | 0        |
| 29.5  | 0         | 44.3   | 0        | 38.6   | 0        |
| 32.9  | 0         | 48     | 0        | 42.2   | 0        |
| 36.3  | 0         | 51.7   | 0        | 45.8   | 0        |
| 39.7  | 0         | 55.4   | 0        | 49.3   | 0        |
| 43.1  | 0         | 59.1   | 0        | 52.9   | 0        |
| 46.6  | 0         | 62.9   | 0        | 56.5   | 0        |
| 50    | 0         | 66.6   | 0        | 60     | 0        |
| 53.4  | 0         | 70.3   | 0        | 63.6   | 0        |
| 56.8  | 0         | 74     | 0        | 67.2   | 0        |
| 60.2  | 0         | 77.7   | 0        | 70.7   | 0        |
| 63.7  | 0         | 81.4   | 0        | 74.3   | 0        |
| 67.1  | 0         | 85.1   | 0        | 77.9   | 0        |
| 70.5  | 0         | 88.8   | 0        | 81.4   | 0        |
| 73.9  | 0         | 92.5   | 0        | 85     | 0        |
| 77.3  | 0         | 96.2   | 0        | 88.6   | 0        |
| 80.8  | 0         | 99.9   | 0        | 92.1   | 0        |
| 84.2  | 0         | 104    | 0        | 95.7   | 0        |
| 87.6  | 0         | 107    | 0        | 99.3   | 0        |
| 91    | 0         | 111    | 0        | 103    | 0        |
| 94.5  | 0         | 115    | 0        | 106    | 0        |
| 97.9  | 0         | 118    | 0        | 110    | 0        |
| 101   | 0         | 122    | 0        | 114    | 0        |
| 105   | 0         | 126    | 0        | 117    | 0        |
| 108   | 0         | 130    | 0        | 121    | 0        |
| 112   | 0         | 133    | 0        | 124    | 0        |
| 115   | 0         | 137    | 0        | 128    | 0        |
| 118   | 0         | 141    | 0        | 131    | 0        |
| 122   | 0         | 144    | 0        | 135    | 0        |
| 125   | 0         | 148    | 0        | 138    | 0        |
| 129   | 0         | --     | --       | 142    | 0        |
| 132   | 0         | --     | --       | 146    | 0        |
| 135   | 0         | --     | --       | 149    | 0        |
| 139   | 0         | --     | --       | --     | --       |
| 142   | 0         | --     | --       | --     | --       |
| 146   | 0         | --     | --       | --     | --       |
| 149   | 0         | --     | --       | --     | --       |

#### 4.A.2.4 PPAD-RAL-12M

|      |   |      |   |      |   |
|------|---|------|---|------|---|
| -149 | 0 | -149 | 0 | -150 | 0 |
|------|---|------|---|------|---|

|        |           |       |           |        |           |
|--------|-----------|-------|-----------|--------|-----------|
| -145   | 0         | -146  | 0         | -146   | 0         |
| -142   | 0         | -142  | 0         | -143   | 0         |
| -139   | 0         | -139  | 0         | -140   | 0         |
| -136   | 0         | -136  | 0         | -136   | 0         |
| -132   | 0         | -132  | 0         | -133   | 0         |
| -129   | 0         | -129  | 0         | -130   | 0         |
| -126   | 0         | -126  | 0         | -126   | 0         |
| -122   | 0         | -123  | 0         | -123   | 0         |
| -119   | 0         | -119  | 0         | -120   | 0         |
| -116   | 0         | -116  | 0         | -117   | 0         |
| -112   | 0         | -113  | 0         | -113   | 0         |
| -109   | 0         | -109  | 0         | -110   | 0         |
| -106   | 0         | -106  | 0         | -107   | 0         |
| -103   | 0         | -103  | 0         | -103   | 0         |
| -99.3  | 0         | -99.4 | 0         | -100   | 0         |
| -96    | 0         | -96.1 | 0         | -96.7  | 0         |
| -92.7  | 0         | -92.8 | 0         | -93.4  | 0         |
| -89.4  | 0         | -89.5 | 0         | -90.1  | 0         |
| -86.1  | 0         | -86.2 | 0         | -86.8  | 0         |
| -82.8  | 0         | -82.9 | 0         | -83.5  | 0         |
| -79.5  | 0         | -79.6 | 0         | -80.2  | 0         |
| -76.2  | 0         | -76.3 | 0         | -76.9  | 0         |
| -72.9  | 0         | -73   | 0         | -73.6  | 0         |
| -69.6  | 0         | -69.7 | 0         | -70.3  | 0         |
| -66.3  | 475.659   | -66.4 | 0         | -67    | 212.783   |
| -63    | 1272.363  | -63.1 | 912.923   | -63.7  | 443.187   |
| -59.7  | 1472.689  | -59.8 | 1521.491  | -60.4  | 535.324   |
| -56.4  | 1097.421  | -56.5 | 1946.147  | -57.1  | 169.479   |
| -53.1  | 1963.582  | -53.2 | 2569.746  | -53.8  | 592.783   |
| -49.8  | 6440.693  | -49.9 | 3604.499  | -50.5  | 1848.147  |
| -46.5  | 14837.53  | -46.6 | 6743.247  | -47.2  | 5211.735  |
| -43.2  | 27729.387 | -43.3 | 12800.216 | -43.9  | 13590.003 |
| -39.9  | 41002.645 | -40   | 19053.482 | -40.6  | 27298.574 |
| -36.6  | 48528.293 | -36.7 | 29164.559 | -37.3  | 44704.535 |
| -33.3  | 47384.125 | -33.4 | 46982.211 | -34    | 53896.602 |
| -30    | 33668.422 | -30.1 | 51563.418 | -30.7  | 48722.262 |
| -26.7  | 17437.531 | -26.8 | 39592.973 | -27.4  | 41675.43  |
| -23.4  | 7744.31   | -23.5 | 33132.824 | -24.1  | 33892.68  |
| -20.1  | 2007.156  | -20.2 | 28795.98  | -20.8  | 20410.334 |
| -16.8  | 0         | -16.9 | 18743.852 | -17.5  | 8212.123  |
| -13.5  | 0         | -13.6 | 8472.72   | -14.2  | 1515.759  |
| -10.2  | 0         | -10.3 | 2673.34   | -10.9  | 0         |
| -6.85  | 0         | -6.99 | 725.171   | -7.56  | 0         |
| -3.55  | 0         | -3.69 | 0         | -4.26  | 0         |
| -0.252 | 0         | -0.39 | 0         | -0.959 | 0         |
| 3.05   | 0         | 2.91  | 0         | 2.34   | 0         |
| 6.35   | 0         | 6.21  | 0         | 5.64   | 0         |
| 9.65   | 0         | 9.51  | 0         | 8.95   | 0         |
| 13     | 0         | 12.8  | 0         | 12.2   | 0         |
| 16.3   | 0         | 16.1  | 0         | 15.5   | 0         |
| 19.6   | 0         | 19.4  | 0         | 18.9   | 0         |
| 22.9   | 0         | 22.7  | 0         | 22.2   | 0         |
| 26.2   | 0         | 26    | 0         | 25.5   | 0         |
| 29.5   | 0         | 29.3  | 0         | 28.8   | 0         |
| 32.8   | 0         | 32.6  | 0         | 32.1   | 0         |
| 36.1   | 0         | 35.9  | 0         | 35.4   | 0         |
| 39.4   | 0         | 39.2  | 0         | 38.7   | 0         |
| 42.7   | 0         | 42.5  | 0         | 42     | 0         |

|      |   |      |   |      |   |
|------|---|------|---|------|---|
| 46   | 0 | 45.8 | 0 | 45.3 | 0 |
| 49.3 | 0 | 49.1 | 0 | 48.6 | 0 |
| 52.6 | 0 | 52.4 | 0 | 51.9 | 0 |
| 55.9 | 0 | 55.7 | 0 | 55.2 | 0 |
| 59.2 | 0 | 59   | 0 | 58.5 | 0 |
| 62.5 | 0 | 62.3 | 0 | 61.8 | 0 |
| 65.8 | 0 | 65.6 | 0 | 65.1 | 0 |
| 69.1 | 0 | 68.9 | 0 | 68.4 | 0 |
| 72.4 | 0 | 72.2 | 0 | 71.7 | 0 |
| 75.7 | 0 | 75.5 | 0 | 75   | 0 |
| 79   | 0 | 78.8 | 0 | 78.3 | 0 |
| 82.3 | 0 | 82.1 | 0 | 81.6 | 0 |
| 85.6 | 0 | 85.4 | 0 | 84.9 | 0 |
| 88.9 | 0 | 88.8 | 0 | 88.2 | 0 |
| 92.2 | 0 | 92.1 | 0 | 91.5 | 0 |
| 95.5 | 0 | 95.4 | 0 | 94.8 | 0 |
| 98.8 | 0 | 98.7 | 0 | 98.1 | 0 |
| 102  | 0 | 102  | 0 | 101  | 0 |
| 105  | 0 | 105  | 0 | 105  | 0 |
| 109  | 0 | 109  | 0 | 108  | 0 |
| 112  | 0 | 112  | 0 | 111  | 0 |
| 115  | 0 | 115  | 0 | 115  | 0 |
| 119  | 0 | 118  | 0 | 118  | 0 |
| 122  | 0 | 122  | 0 | 121  | 0 |
| 125  | 0 | 125  | 0 | 125  | 0 |
| 128  | 0 | 128  | 0 | 128  | 0 |
| 132  | 0 | 132  | 0 | 131  | 0 |
| 135  | 0 | 135  | 0 | 134  | 0 |
| 138  | 0 | 138  | 0 | 138  | 0 |
| 142  | 0 | 142  | 0 | 141  | 0 |
| 145  | 0 | 145  | 0 | 144  | 0 |
| 148  | 0 | 148  | 0 | 148  | 0 |

#### 4.A.2.5 PPAD-AIE-2M

|       |   |       |   |       |   |
|-------|---|-------|---|-------|---|
| -149  | 0 | -148  | 0 | -149  | 0 |
| -145  | 0 | -145  | 0 | -145  | 0 |
| -142  | 0 | -141  | 0 | -142  | 0 |
| -139  | 0 | -138  | 0 | -139  | 0 |
| -135  | 0 | -135  | 0 | -135  | 0 |
| -132  | 0 | -131  | 0 | -132  | 0 |
| -129  | 0 | -128  | 0 | -129  | 0 |
| -125  | 0 | -125  | 0 | -125  | 0 |
| -122  | 0 | -121  | 0 | -122  | 0 |
| -119  | 0 | -118  | 0 | -119  | 0 |
| -116  | 0 | -115  | 0 | -115  | 0 |
| -112  | 0 | -112  | 0 | -112  | 0 |
| -109  | 0 | -108  | 0 | -109  | 0 |
| -106  | 0 | -105  | 0 | -106  | 0 |
| -102  | 0 | -102  | 0 | -102  | 0 |
| -99.1 | 0 | -98.3 | 0 | -99   | 0 |
| -95.8 | 0 | -95   | 0 | -95.7 | 0 |
| -92.5 | 0 | -91.7 | 0 | -92.4 | 0 |
| -89.2 | 0 | -88.4 | 0 | -89.1 | 0 |
| -85.8 | 0 | -85.1 | 0 | -85.8 | 0 |
| -82.5 | 0 | -81.8 | 0 | -82.5 | 0 |
| -79.2 | 0 | -78.5 | 0 | -79.2 | 0 |
| -75.9 | 0 | -75.2 | 0 | -75.9 | 0 |

|        |           |       |           |        |           |
|--------|-----------|-------|-----------|--------|-----------|
| -72.6  | 0         | -71.9 | 0         | -72.6  | 0         |
| -69.3  | 0         | -68.6 | 0         | -69.3  | 0         |
| -66    | 0         | -65.3 | 0         | -66    | 0         |
| -62.7  | 0         | -62   | 0         | -62.7  | 0         |
| -59.4  | 1140.792  | -58.7 | 836.099   | -59.4  | 770.646   |
| -56.1  | 2432.931  | -55.4 | 3253.43   | -56.1  | 2259.83   |
| -52.8  | 6846.625  | -52.1 | 7056.69   | -52.8  | 10166.047 |
| -49.5  | 17813.42  | -48.8 | 12827.917 | -49.4  | 25211.629 |
| -46.2  | 33484.34  | -45.5 | 19853.916 | -46.1  | 40644.629 |
| -42.9  | 50862.215 | -42.2 | 29123.469 | -42.8  | 59330.934 |
| -39.6  | 63174.223 | -38.9 | 45695.41  | -39.5  | 67060.469 |
| -36.3  | 68045.477 | -35.6 | 59638.883 | -36.2  | 60400.871 |
| -33    | 70677.531 | -32.3 | 58384.613 | -32.9  | 56817.848 |
| -29.7  | 66110.633 | -29   | 50627.477 | -29.6  | 55393.488 |
| -26.4  | 54268.941 | -25.7 | 43177.223 | -26.3  | 55272.539 |
| -23.1  | 44939.234 | -22.4 | 39574.418 | -23    | 47417.805 |
| -19.8  | 34760.773 | -19.1 | 36941.715 | -19.7  | 29787.979 |
| -16.5  | 18530.277 | -15.8 | 22905.602 | -16.4  | 15374.55  |
| -13.2  | 7002.356  | -12.5 | 8102.833  | -13.1  | 5839.005  |
| -9.93  | 2590.064  | -9.19 | 2652.482  | -9.82  | 933.807   |
| -6.63  | 0         | -5.89 | 374.525   | -6.52  | 0         |
| -3.33  | 0         | -2.59 | 0         | -3.21  | 0         |
| -0.032 | 0         | 0.711 | 0         | 0.0892 | 0         |
| 3.27   | 0         | 4.01  | 0         | 3.39   | 0         |
| 6.57   | 0         | 7.31  | 0         | 6.69   | 0         |
| 9.87   | 0         | 10.6  | 0         | 10     | 0         |
| 13.2   | 0         | 13.9  | 0         | 13.3   | 0         |
| 16.5   | 0         | 17.2  | 0         | 16.6   | 0         |
| 19.8   | 0         | 20.5  | 0         | 19.9   | 0         |
| 23.1   | 0         | 23.8  | 0         | 23.2   | 0         |
| 26.4   | 0         | 27.1  | 0         | 26.5   | 0         |
| 29.7   | 0         | 30.4  | 0         | 29.8   | 0         |
| 33     | 0         | 33.7  | 0         | 33.1   | 0         |
| 36.3   | 0         | 37    | 0         | 36.4   | 0         |
| 39.6   | 0         | 40.3  | 0         | 39.7   | 0         |
| 42.9   | 0         | 43.6  | 0         | 43     | 0         |
| 46.2   | 0         | 46.9  | 0         | 46.3   | 0         |
| 49.5   | 0         | 50.2  | 0         | 49.6   | 0         |
| 52.8   | 0         | 53.5  | 0         | 52.9   | 0         |
| 56.1   | 0         | 56.8  | 0         | 56.2   | 0         |
| 59.4   | 0         | 60.1  | 0         | 59.5   | 0         |
| 62.7   | 0         | 63.4  | 0         | 62.8   | 0         |
| 66     | 0         | 66.7  | 0         | 66.1   | 0         |
| 69.3   | 0         | 70    | 0         | 69.4   | 0         |
| 72.6   | 0         | 73.4  | 0         | 72.7   | 0         |
| 75.9   | 0         | 76.7  | 0         | 76     | 0         |
| 79.2   | 0         | 80    | 0         | 79.3   | 0         |
| 82.5   | 0         | 83.3  | 0         | 82.7   | 0         |
| 85.8   | 0         | 86.6  | 0         | 86     | 0         |
| 89.1   | 0         | 89.9  | 0         | 89.3   | 0         |
| 92.4   | 0         | 93.2  | 0         | 92.6   | 0         |
| 95.7   | 0         | 96.5  | 0         | 95.9   | 0         |
| 99     | 0         | 99.8  | 0         | 99.2   | 0         |
| 102    | 0         | 103   | 0         | 102    | 0         |
| 106    | 0         | 106   | 0         | 106    | 0         |
| 109    | 0         | 110   | 0         | 109    | 0         |
| 112    | 0         | 113   | 0         | 112    | 0         |
| 115    | 0         | 116   | 0         | 116    | 0         |

|     |   |     |   |     |   |
|-----|---|-----|---|-----|---|
| 119 | 0 | 120 | 0 | 119 | 0 |
| 122 | 0 | 123 | 0 | 122 | 0 |
| 125 | 0 | 126 | 0 | 126 | 0 |
| 129 | 0 | 129 | 0 | 129 | 0 |
| 132 | 0 | 133 | 0 | 132 | 0 |
| 135 | 0 | 136 | 0 | 135 | 0 |
| 139 | 0 | 139 | 0 | 139 | 0 |
| 142 | 0 | 143 | 0 | 142 | 0 |
| 145 | 0 | 146 | 0 | 145 | 0 |
| 148 | 0 | 149 | 0 | 149 | 0 |

#### 4.A.2.6 PPAD-AIE-12M

|       |           |       |           |       |           |
|-------|-----------|-------|-----------|-------|-----------|
| -147  | 0         | -148  | 0         | -149  | 0         |
| -144  | 0         | -144  | 0         | -146  | 0         |
| -140  | 0         | -141  | 0         | -143  | 0         |
| -137  | 0         | -138  | 0         | -140  | 0         |
| -134  | 0         | -134  | 0         | -136  | 0         |
| -130  | 0         | -131  | 0         | -133  | 0         |
| -127  | 0         | -128  | 0         | -130  | 0         |
| -124  | 19.669    | -124  | 0         | -126  | 0         |
| -120  | 261.576   | -121  | 0         | -123  | 0         |
| -117  | 204.833   | -118  | 0         | -120  | 0         |
| -114  | 957.517   | -115  | 0         | -116  | 170.958   |
| -111  | 1540.388  | -111  | 0         | -113  | 721.029   |
| -107  | 346.232   | -108  | 0         | -110  | 2894.56   |
| -104  | 0         | -105  | 440.313   | -107  | 7074.841  |
| -101  | 0         | -101  | 1926.261  | -103  | 13594.247 |
| -97.3 | 0         | -98   | 4780.802  | -99.9 | 20399.121 |
| -94   | 0         | -94.7 | 10188.403 | -96.6 | 21026.879 |
| -90.7 | 0         | -91.4 | 14426.807 | -93.3 | 17019.586 |
| -87.4 | 1657.69   | -88.1 | 14725.913 | -90   | 13283.076 |
| -84.1 | 4118.004  | -84.8 | 13439.438 | -86.7 | 8406.854  |
| -80.8 | 7311.334  | -81.5 | 11740.02  | -83.4 | 3305.677  |
| -77.5 | 8172.343  | -78.2 | 8365.596  | -80.1 | 544.677   |
| -74.2 | 7399.683  | -74.9 | 4511.29   | -76.8 | 0         |
| -70.9 | 9163.975  | -71.6 | 1858.464  | -73.5 | 0         |
| -67.6 | 10742.027 | -68.3 | 0         | -70.2 | 0         |
| -64.3 | 8357.912  | -65   | 0         | -66.9 | 0         |
| -61   | 4928.044  | -61.7 | 0         | -63.6 | 0         |
| -57.7 | 3115.959  | -58.4 | 0         | -60.3 | 0         |
| -54.4 | 1390.412  | -55.1 | 0         | -57   | 0         |
| -51.1 | 0         | -51.8 | 0         | -53.7 | 0         |
| -47.8 | 0         | -48.5 | 0         | -50.4 | 0         |
| -44.5 | 0         | -45.2 | 0         | -47.1 | 0         |
| -41.2 | 0         | -41.9 | 0         | -43.8 | 0         |
| -37.9 | 0         | -38.6 | 0         | -40.5 | 0         |
| -34.6 | 0         | -35.3 | 0         | -37.2 | 0         |
| -31.3 | 0         | -32   | 0         | -33.9 | 0         |
| -28   | 527.534   | -28.7 | 0         | -30.6 | 0         |
| -24.7 | 2476.628  | -25.4 | 0         | -27.3 | 0         |
| -21.4 | 5741.797  | -22.1 | 275.64    | -24   | 0         |
| -18.1 | 10983.361 | -18.8 | 1803.293  | -20.7 | 0         |
| -14.8 | 16234.024 | -15.5 | 6143.839  | -17.4 | 702.51    |
| -11.5 | 22335.371 | -12.2 | 10451.127 | -14.1 | 3867.325  |
| -8.19 | 30414.818 | -8.9  | 14581.388 | -10.8 | 10845.725 |
| -4.89 | 36930.016 | -5.59 | 22036.158 | -7.47 | 24061.479 |
| -1.59 | 39828.902 | -2.29 | 27897.086 | -4.17 | 38435.723 |

|      |           |      |           |        |           |
|------|-----------|------|-----------|--------|-----------|
| 1.71 | 43960.191 | 1.01 | 35143.488 | -0.866 | 47867.074 |
| 5.01 | 41593.703 | 4.31 | 44232.457 | 2.44   | 56131.617 |
| 8.31 | 24884.053 | 7.61 | 42186.848 | 5.74   | 55482.242 |
| 11.6 | 10518.233 | 10.9 | 27308.16  | 9.04   | 37729.387 |
| 14.9 | 4888.391  | 14.2 | 12994.421 | 12.3   | 18991.029 |
| 18.2 | 1701.455  | 17.5 | 6853.829  | 15.6   | 8587.912  |
| 21.5 | 96.937    | 20.8 | 3631.479  | 18.9   | 2600.943  |
| 24.8 | 0         | 24.1 | 933.707   | 22.2   | 0         |
| 28.1 | 0         | 27.4 | 0         | 25.6   | 0         |
| 31.4 | 0         | 30.7 | 0         | 28.9   | 0         |
| 34.7 | 0         | 34   | 0         | 32.2   | 0         |
| 38   | 0         | 37.3 | 0         | 35.5   | 0         |
| 41.3 | 0         | 40.6 | 0         | 38.8   | 0         |
| 44.6 | 0         | 43.9 | 0         | 42.1   | 0         |
| 47.9 | 0         | 47.2 | 0         | 45.4   | 0         |
| 51.2 | 0         | 50.5 | 0         | 48.7   | 0         |
| 54.5 | 0         | 53.8 | 0         | 52     | 0         |
| 57.8 | 0         | 57.1 | 0         | 55.3   | 0         |
| 61.1 | 0         | 60.4 | 0         | 58.6   | 0         |
| 64.4 | 0         | 63.7 | 0         | 61.9   | 0         |
| 67.7 | 0         | 67   | 0         | 65.2   | 0         |
| 71   | 0         | 70.3 | 0         | 68.5   | 0         |
| 74.3 | 0         | 73.6 | 0         | 71.8   | 0         |
| 77.6 | 0         | 76.9 | 0         | 75.1   | 0         |
| 80.9 | 0         | 80.2 | 0         | 78.4   | 0         |
| 84.2 | 0         | 83.5 | 0         | 81.7   | 0         |
| 87.5 | 0         | 86.9 | 0         | 85     | 0         |
| 90.8 | 0         | 90.2 | 0         | 88.3   | 0         |
| 94.1 | 0         | 93.5 | 0         | 91.6   | 0         |
| 97.4 | 0         | 96.8 | 0         | 94.9   | 0         |
| 101  | 0         | 100  | 0         | 98.2   | 0         |
| 104  | 0         | 103  | 0         | 102    | 0         |
| 107  | 0         | 107  | 0         | 105    | 0         |
| 111  | 0         | 110  | 0         | 108    | 0         |
| 114  | 0         | 113  | 0         | 111    | 0         |
| 117  | 0         | 117  | 0         | 115    | 0         |
| 121  | 0         | 120  | 0         | 118    | 0         |
| 124  | 0         | 123  | 0         | 121    | 0         |
| 127  | 0         | 126  | 0         | 125    | 0         |
| 130  | 0         | 130  | 0         | 128    | 0         |
| 134  | 0         | 133  | 0         | 131    | 0         |
| 137  | 0         | 136  | 0         | 135    | 0         |
| 140  | 0         | 140  | 0         | 138    | 0         |
| 144  | 0         | 143  | 0         | 141    | 0         |
| 147  | 0         | 146  | 0         | 144    | 0         |
|      |           | 150  | 0         | 148    | 0         |

#### 4.A.2.7 PPAD-LiTFSI

|      |   |      |   |      |   |
|------|---|------|---|------|---|
| -143 | 0 | -145 | 0 | -142 | 0 |
| -140 | 0 | -142 | 0 | -138 | 0 |
| -137 | 0 | -138 | 0 | -135 | 0 |
| -133 | 0 | -135 | 0 | -131 | 0 |
| -130 | 0 | -132 | 0 | -128 | 0 |
| -127 | 0 | -128 | 0 | -125 | 0 |
| -124 | 0 | -125 | 0 | -121 | 0 |
| -120 | 0 | -122 | 0 | -118 | 0 |
| -117 | 0 | -118 | 0 | -114 | 0 |



|       |           |       |            |       |           |
|-------|-----------|-------|------------|-------|-----------|
| -114  | 0         | -115  | 0          | -111  | 0         |
| -110  | 0         | -112  | 0          | -108  | 0         |
| -107  | 0         | -108  | 0          | -104  | 0         |
| -104  | 0         | -105  | 0          | -101  | 0         |
| -100  | 0         | -102  | 0          | -97.6 | 0         |
| -97.1 | 0         | -98.5 | 0          | -94.2 | 0         |
| -93.8 | 0         | -95.2 | 0          | -90.8 | 0         |
| -90.5 | 2492.988  | -91.8 | 0          | -87.4 | 0         |
| -87.2 | 6301.308  | -88.5 | 0          | -84.1 | 767.704   |
| -83.9 | 8230.181  | -85.2 | 2071.441   | -80.7 | 5043.635  |
| -80.6 | 9513.003  | -81.9 | 11099.619  | -77.3 | 18649.295 |
| -77.3 | 11945.568 | -78.5 | 51354.152  | -73.9 | 46299.969 |
| -74   | 29804.545 | -75.2 | 102285.414 | -70.5 | 74696.133 |
| -70.7 | 47296.449 | -71.9 | 91915.688  | -67.2 | 72712.469 |
| -67.4 | 32336.234 | -68.6 | 42478.473  | -63.8 | 39234.449 |
| -64.1 | 10301.055 | -65.2 | 17404.527  | -60.4 | 14463.496 |
| -60.8 | 4189.107  | -61.9 | 10242.528  | -57   | 4077.77   |
| -57.5 | 1483.074  | -58.6 | 4425.692   | -53.6 | 0         |
| -54.2 | 279.29    | -55.3 | 0          | -50.3 | 0         |
| -50.9 | 1233.846  | -51.9 | 0          | -46.9 | 0         |
| -47.6 | 239.201   | -48.6 | 0          | -43.5 | 0         |
| -44.3 | 0         | -45.3 | 0          | -40.1 | 0         |
| -41   | 0         | -42   | 0          | -36.7 | 0         |
| -37.7 | 0         | -38.7 | 0          | -33.4 | 0         |
| -34.4 | 0         | -35.3 | 0          | -30   | 0         |
| -31.1 | 0         | -32   | 0          | -26.6 | 0         |
| -27.8 | 0         | -28.7 | 0          | -23.2 | 0         |
| -24.5 | 0         | -25.4 | 0          | -19.8 | 0         |
| -21.2 | 0         | -22   | 0          | -16.5 | 0         |
| -17.9 | 0         | -18.7 | 0          | -13.1 | 0         |
| -14.6 | 0         | -15.4 | 0          | -9.69 | 0         |
| -11.3 | 0         | -12.1 | 0          | -6.31 | 0         |
| -7.96 | 0         | -8.73 | 0          | -2.93 | 0         |
| -4.66 | 0         | -5.41 | 0          | 0.453 | 0         |
| -1.36 | 0         | -2.08 | 0          | 3.83  | 0         |
| 1.94  | 0         | 1.24  | 0          | 7.21  | 0         |
| 5.24  | 0         | 4.57  | 0          | 10.6  | 0         |
| 8.54  | 0         | 7.89  | 0          | 14    | 0         |
| 11.8  | 0         | 11.2  | 0          | 17.4  | 0         |
| 15.1  | 0         | 14.5  | 0          | 20.7  | 0         |
| 18.4  | 0         | 17.9  | 0          | 24.1  | 0         |
| 21.7  | 0         | 21.2  | 0          | 27.5  | 0         |
| 25.1  | 0         | 24.5  | 0          | 30.9  | 0         |
| 28.4  | 0         | 27.8  | 0          | 34.3  | 0         |
| 31.7  | 0         | 31.2  | 0          | 37.6  | 0         |
| 35    | 0         | 34.5  | 0          | 41    | 0         |
| 38.3  | 0         | 37.8  | 0          | 44.4  | 0         |
| 41.6  | 0         | 41.1  | 0          | 47.8  | 0         |
| 44.9  | 0         | 44.5  | 0          | 51.2  | 0         |
| 48.2  | 0         | 47.8  | 0          | 54.5  | 0         |
| 51.5  | 0         | 51.1  | 0          | 57.9  | 0         |
| 54.8  | 0         | 54.4  | 0          | 61.3  | 0         |
| 58.1  | 0         | 57.8  | 0          | 64.7  | 0         |
| 61.4  | 0         | 61.1  | 0          | 68.1  | 0         |
| 64.7  | 0         | 64.4  | 0          | 71.4  | 0         |
| 68    | 0         | 67.7  | 0          | 74.8  | 0         |
| 71.3  | 0         | 71.1  | 0          | 78.2  | 0         |
| 74.6  | 0         | 74.4  | 0          | 81.6  | 0         |

|      |           |      |           |      |           |
|------|-----------|------|-----------|------|-----------|
| 77.9 | 0         | 77.7 | 0         | 85   | 0         |
| 81.2 | 0         | 81   | 0         | 88.3 | 0         |
| 84.5 | 0         | 84.4 | 0         | 91.7 | 0         |
| 87.8 | 0         | 87.7 | 131.342   | 95.1 | 0         |
| 91.1 | 159.128   | 91   | 3242.365  | 98.5 | 256.362   |
| 94.4 | 3206.453  | 94.3 | 6094.125  | 102  | 6211.74   |
| 97.7 | 13930.41  | 97.7 | 18283.383 | 105  | 18139.961 |
| 101  | 21870.168 | 101  | 46412.406 | 109  | 34466.613 |
| 104  | 14448.385 | 104  | 53016.891 | 112  | 34754.875 |
| 108  | 5913.007  | 108  | 24210.439 | 115  | 20387.23  |
| 111  | 4522.319  | 111  | 1804.698  | 119  | 6185.094  |
| 114  | 3884.602  | 114  | 0         | 122  | 0         |
| 117  | 2574.392  | 118  | 0         | 126  | 0         |
| 121  | 895.033   | 121  | 0         | 129  | 0         |
| 124  | 0         | 124  | 0         | 132  | 0         |
| 127  | 0         | 128  | 0         | 136  | 0         |
| 131  | 0         | 131  | 0         | 139  | 0         |
| 134  | 0         | 134  | 0         | 142  | 0         |
| 137  | 0         | 138  | 0         | 146  | 0         |
| 141  | 0         | 141  | 0         | 149  | 0         |
| 144  | 0         | 144  | 0         | --   | --        |
| 147  | 0         | 148  | 0         | --   | --        |

#### 4.A.2.8 PPAD-LITFSI-RAL

|       |         |       |   |       |           |
|-------|---------|-------|---|-------|-----------|
| -149  | 0       | -148  | 0 | -148  | 0         |
| -146  | 0       | -145  | 0 | -145  | 0         |
| -142  | 0       | -142  | 0 | -141  | 0         |
| -139  | 0       | -138  | 0 | -138  | 0         |
| -136  | 0       | -135  | 0 | -135  | 0         |
| -132  | 0       | -132  | 0 | -131  | 0         |
| -129  | 0       | -128  | 0 | -128  | 0         |
| -126  | 0       | -125  | 0 | -125  | 0         |
| -123  | 0       | -122  | 0 | -121  | 0         |
| -119  | 0       | -119  | 0 | -118  | 0         |
| -116  | 0       | -115  | 0 | -115  | 0         |
| -113  | 0       | -112  | 0 | -112  | 0         |
| -109  | 0       | -109  | 0 | -108  | 0         |
| -106  | 0       | -105  | 0 | -105  | 0         |
| -103  | 0       | -102  | 0 | -102  | 0         |
| -99.6 | 0       | -98.8 | 0 | -98.4 | 0         |
| -96.3 | 0       | -95.5 | 0 | -95.1 | 0         |
| -93   | 0       | -92.2 | 0 | -91.8 | 0         |
| -89.7 | 0       | -88.9 | 0 | -88.5 | 0         |
| -86.4 | 0       | -85.6 | 0 | -85.2 | 0         |
| -83.1 | 0       | -82.3 | 0 | -81.9 | 0         |
| -79.8 | 0       | -79   | 0 | -78.6 | 0         |
| -76.6 | 0       | -75.7 | 0 | -75.3 | 0         |
| -73.3 | 0       | -72.4 | 0 | -72.1 | 0         |
| -70   | 0       | -69.1 | 0 | -68.8 | 0         |
| -66.7 | 0       | -65.8 | 0 | -65.5 | 0         |
| -63.4 | 0       | -62.5 | 0 | -62.2 | 0         |
| -60.1 | 0       | -59.3 | 0 | -58.9 | 0         |
| -56.8 | 237.926 | -56   | 0 | -55.6 | 0         |
| -53.5 | 0       | -52.7 | 0 | -52.3 | 316.393   |
| -50.2 | 0       | -49.4 | 0 | -49   | 612.556   |
| -46.9 | 0       | -46.1 | 0 | -45.7 | 5768.708  |
| -43.6 | 0       | -42.8 | 0 | -42.4 | 12215.343 |

|        |            |          |            |       |           |
|--------|------------|----------|------------|-------|-----------|
| -40.4  | 0          | -39.5    | 0          | -39.1 | 16584.322 |
| -37.1  | 0          | -36.2    | 1518.569   | -35.8 | 23553.859 |
| -33.8  | 6887.18    | -32.9    | 10283.428  | -32.5 | 32627.893 |
| -30.5  | 27715.809  | -29.6    | 44137.277  | -29.2 | 50208.621 |
| -27.2  | 66751.75   | -26.3    | 91056.133  | -25.9 | 64306.844 |
| -23.9  | 109251.305 | -23      | 101662.039 | -22.6 | 61762.066 |
| -20.6  | 120432.594 | -19.8    | 88957.508  | -19.3 | 58309.332 |
| -17.3  | 91901.906  | -16.5    | 70878.281  | -16   | 49410.066 |
| -14    | 50254.855  | -13.2    | 40567.352  | -12.7 | 35850.238 |
| -10.7  | 21089.332  | -9.88    | 16214.93   | -9.44 | 33353.734 |
| -7.45  | 6155.068   | -6.59    | 5360.332   | -6.14 | 30128.951 |
| -4.16  | 0          | -3.3     | 0          | -2.85 | 17859.117 |
| -0.865 | 0          | -0.00467 | 0          | 0.45  | 10008.648 |
| 2.43   | 0          | 3.29     | 0          | 3.75  | 7428.231  |
| 5.72   | 0          | 6.58     | 0          | 7.04  | 3046.619  |
| 9.01   | 0          | 9.87     | 0          | 10.3  | 0         |
| 12.3   | 0          | 13.2     | 0          | 13.6  | 0         |
| 15.6   | 0          | 16.5     | 0          | 16.9  | 0         |
| 18.9   | 0          | 19.7     | 0          | 20.2  | 0         |
| 22.2   | 0          | 23       | 0          | 23.5  | 0         |
| 25.5   | 0          | 26.3     | 0          | 26.8  | 0         |
| 28.8   | 0          | 29.6     | 0          | 30.1  | 0         |
| 32     | 0          | 32.9     | 0          | 33.4  | 0         |
| 35.3   | 0          | 36.2     | 0          | 36.7  | 0         |
| 38.6   | 0          | 39.5     | 0          | 40    | 0         |
| 41.9   | 0          | 42.8     | 0          | 43.3  | 0         |
| 45.2   | 0          | 46.1     | 0          | 46.6  | 0         |
| 48.5   | 0          | 49.4     | 0          | 49.9  | 0         |
| 51.8   | 0          | 52.7     | 0          | 53.2  | 0         |
| 55.1   | 0          | 56       | 0          | 56.5  | 0         |
| 58.4   | 0          | 59.2     | 0          | 59.8  | 0         |
| 61.7   | 0          | 62.5     | 0          | 63.1  | 0         |
| 64.9   | 0          | 65.8     | 0          | 66.4  | 0         |
| 68.2   | 0          | 69.1     | 0          | 69.7  | 0         |
| 71.5   | 0          | 72.4     | 0          | 73    | 0         |
| 74.8   | 0          | 75.7     | 0          | 76.2  | 0         |
| 78.1   | 0          | 79       | 0          | 79.5  | 0         |
| 81.4   | 0          | 82.3     | 0          | 82.8  | 0         |
| 84.7   | 0          | 85.6     | 0          | 86.1  | 0         |
| 88     | 0          | 88.9     | 0          | 89.4  | 0         |
| 91.3   | 0          | 92.2     | 0          | 92.7  | 0         |
| 94.6   | 0          | 95.5     | 0          | 96    | 0         |
| 97.9   | 0          | 98.7     | 0          | 99.3  | 0         |
| 101    | 0          | 102      | 0          | 103   | 0         |
| 104    | 0          | 105      | 0          | 106   | 0         |
| 108    | 0          | 109      | 0          | 109   | 0         |
| 111    | 0          | 112      | 0          | 112   | 0         |
| 114    | 0          | 115      | 0          | 116   | 0         |
| 118    | 0          | 118      | 0          | 119   | 0         |
| 121    | 0          | 122      | 0          | 122   | 0         |
| 124    | 0          | 125      | 0          | 126   | 0         |
| 127    | 0          | 128      | 0          | 129   | 0         |
| 131    | 0          | 132      | 0          | 132   | 0         |
| 134    | 0          | 135      | 0          | 136   | 0         |
| 137    | 0          | 138      | 0          | 139   | 0         |
| 141    | 0          | 142      | 0          | 142   | 0         |
| 144    | 0          | 145      | 0          | 145   | 0         |
| 147    | 0          | 148      | 0          | 149   | 0         |

#### 4.A.2.9 PPAD-LITFSI-RAL-12M

|       |           |       |           |       |           |
|-------|-----------|-------|-----------|-------|-----------|
| -150  | 0         | -148  | 0         | -148  | 0         |
| -146  | 0         | -145  | 0         | -145  | 0         |
| -143  | 0         | -142  | 0         | -141  | 0         |
| -140  | 0         | -138  | 0         | -138  | 0         |
| -136  | 0         | -135  | 0         | -135  | 0         |
| -133  | 0         | -132  | 0         | -131  | 0         |
| -130  | 0         | -129  | 0         | -128  | 0         |
| -127  | 0         | -125  | 0         | -125  | 0         |
| -123  | 0         | -122  | 0         | -121  | 0         |
| -120  | 0         | -119  | 0         | -118  | 0         |
| -117  | 0         | -115  | 0         | -115  | 0         |
| -113  | 0         | -112  | 0         | -112  | 0         |
| -110  | 0         | -109  | 0         | -108  | 0         |
| -107  | 0         | -105  | 0         | -105  | 0         |
| -104  | 0         | -102  | 0         | -102  | 0         |
| -100  | 0         | -98.8 | 0         | -98.4 | 0         |
| -97   | 0         | -95.5 | 0         | -95.1 | 0         |
| -93.7 | 0         | -92.2 | 0         | -91.8 | 0         |
| -90.4 | 0         | -88.9 | 0         | -88.4 | 0         |
| -87.1 | 0         | -85.6 | 0         | -85.1 | 0         |
| -83.8 | 0         | -82.3 | 0         | -81.8 | 0         |
| -80.5 | 0         | -78.9 | 0         | -78.5 | 0         |
| -77.2 | 0         | -75.6 | 0         | -75.2 | 0         |
| -73.9 | 0         | -72.3 | 0         | -71.9 | 0         |
| -70.6 | 0         | -69   | 0         | -68.6 | 0         |
| -67.3 | 0         | -65.7 | 0         | -65.3 | 0         |
| -64   | 0         | -62.4 | 0         | -62   | 0         |
| -60.8 | 0         | -59.1 | 0         | -58.7 | 0         |
| -57.5 | 0         | -55.8 | 0         | -55.4 | 0         |
| -54.2 | 0         | -52.5 | 0         | -52.1 | 0         |
| -50.9 | 0         | -49.2 | 0         | -48.8 | 0         |
| -47.6 | 0         | -45.9 | 0         | -45.5 | 0         |
| -44.3 | 0         | -42.6 | 0         | -42.2 | 736.28    |
| -41   | 0         | -39.3 | 669.742   | -38.9 | 1882.359  |
| -37.7 | 5159      | -36   | 2502.427  | -35.6 | 6124.278  |
| -34.4 | 15987.623 | -32.7 | 5860.004  | -32.3 | 17315.396 |
| -31.1 | 26286.709 | -29.4 | 13622.25  | -29   | 37268.391 |
| -27.8 | 36631.297 | -26.1 | 26536.941 | -25.7 | 51222.957 |
| -24.5 | 57774.207 | -22.8 | 39876.32  | -22.4 | 49343.648 |
| -21.3 | 71146.594 | -19.5 | 45144.035 | -19   | 41395.875 |
| -18   | 55549.621 | -16.2 | 38329.832 | -15.7 | 27133.453 |
| -14.7 | 31590.688 | -12.9 | 27363.648 | -12.4 | 11503.2   |
| -11.4 | 15524.393 | -9.57 | 17886.258 | -9.13 | 4161.801  |
| -8.09 | 8041.21   | -6.27 | 10205.915 | -5.83 | 1508.543  |
| -4.8  | 5605.127  | -2.97 | 5893.59   | -2.52 | 194.984   |
| -1.51 | 3436.936  | 0.337 | 3898.038  | 0.781 | 0         |
| 1.78  | 1813.978  | 3.64  | 2267.838  | 4.09  | 0         |
| 5.07  | 718.392   | 6.94  | 1257.85   | 7.39  | 0         |
| 8.36  | 0         | 10.2  | 443.083   | 10.7  | 0         |
| 11.7  | 0         | 13.6  | 0         | 14    | 0         |
| 14.9  | 0         | 16.9  | 0         | 17.3  | 0         |
| 18.2  | 0         | 20.2  | 0         | 20.6  | 0         |
| 21.5  | 0         | 23.5  | 0         | 23.9  | 0         |
| 24.8  | 0         | 26.8  | 0         | 27.2  | 0         |
| 28.1  | 0         | 30.1  | 0         | 30.5  | 0         |

|      |          |      |   |      |   |
|------|----------|------|---|------|---|
| 31.4 | 0        | 33.4 | 0 | 33.8 | 0 |
| 34.7 | 0        | 36.7 | 0 | 37.1 | 0 |
| 38   | 0        | 40   | 0 | 40.4 | 0 |
| 41.3 | 0        | 43.3 | 0 | 43.7 | 0 |
| 44.6 | 0        | 46.6 | 0 | 47   | 0 |
| 47.9 | 0        | 49.9 | 0 | 50.4 | 0 |
| 51.2 | 845.141  | 53.2 | 0 | 53.7 | 0 |
| 54.4 | 2754.689 | 56.5 | 0 | 57   | 0 |
| 57.7 | 3009.933 | 59.8 | 0 | 60.3 | 0 |
| 61   | 0        | 63.1 | 0 | 63.6 | 0 |
| 64.3 | 0        | 66.4 | 0 | 66.9 | 0 |
| 67.6 | 0        | 69.7 | 0 | 70.2 | 0 |
| 70.9 | 0        | 73   | 0 | 73.5 | 0 |
| 74.2 | 610.815  | 76.3 | 0 | 76.8 | 0 |
| 77.5 | 0        | 79.6 | 0 | 80.1 | 0 |
| 80.8 | 0        | 82.9 | 0 | 83.4 | 0 |
| 84.1 | 0        | 86.2 | 0 | 86.7 | 0 |
| 87.4 | 0        | 89.5 | 0 | 90   | 0 |
| 90.6 | 0        | 92.8 | 0 | 93.3 | 0 |
| 93.9 | 0        | 96.1 | 0 | 96.6 | 0 |
| 97.2 | 0        | 99.4 | 0 | 99.9 | 0 |
| 101  | 0        | 103  | 0 | 103  | 0 |
| 104  | 0        | 106  | 0 | 107  | 0 |
| 107  | 0        | 109  | 0 | 110  | 0 |
| 110  | 0        | 113  | 0 | 113  | 0 |
| 114  | 0        | 116  | 0 | 116  | 0 |
| 117  | 0        | 119  | 0 | 120  | 0 |
| 120  | 0        | 123  | 0 | 123  | 0 |
| 124  | 0        | 126  | 0 | 126  | 0 |
| 127  | 0        | 129  | 0 | 130  | 0 |
| 130  | 0        | 132  | 0 | 133  | 0 |
| 133  | 0        | 136  | 0 | 136  | 0 |
| 137  | 0        | 139  | 0 | 140  | 0 |
| 140  | 0        | 142  | 0 | 143  | 0 |
| 143  | 0        | 146  | 0 | 146  | 0 |
| 147  | 0        | 149  | 0 | 149  | 0 |
| 150  | 0        |      |   |      |   |

#### 4.A.2.10 PPAD-LiTFSI-2M

|       |   |      |    |      |    |
|-------|---|------|----|------|----|
| -148  | 0 | --   | -- | --   | -- |
| -145  | 0 | --   | -- | --   | -- |
| -141  | 0 | --   | -- | --   | -- |
| -138  | 0 | --   | -- | --   | -- |
| -135  | 0 | --   | -- | --   | -- |
| -132  | 0 | --   | -- | --   | -- |
| -128  | 0 | --   | -- | --   | -- |
| -125  | 0 | --   | -- | --   | -- |
| -122  | 0 | --   | -- | --   | -- |
| -118  | 0 | --   | -- | --   | -- |
| -115  | 0 | --   | -- | --   | -- |
| -112  | 0 | --   | -- | --   | -- |
| -109  | 0 | -148 | 0  | -149 | 0  |
| -105  | 0 | -144 | 0  | -146 | 0  |
| -102  | 0 | -141 | 0  | -143 | 0  |
| -98.6 | 0 | -138 | 0  | -139 | 0  |
| -95.3 | 0 | -134 | 0  | -136 | 0  |
| -92.1 | 0 | -131 | 0  | -133 | 0  |

|        |            |       |            |       |            |
|--------|------------|-------|------------|-------|------------|
| -88.8  | 0          | -128  | 0          | -129  | 0          |
| -85.5  | 0          | -125  | 0          | -126  | 0          |
| -82.2  | 0          | -121  | 0          | -123  | 0          |
| -78.9  | 0          | -118  | 0          | -120  | 0          |
| -75.6  | 0          | -115  | 0          | -116  | 0          |
| -72.3  | 0          | -111  | 0          | -113  | 0          |
| -69    | 0          | -108  | 0          | -110  | 0          |
| -65.7  | 0          | -105  | 0          | -106  | 0          |
| -62.4  | 0          | -101  | 0          | -103  | 0          |
| -59.1  | 0          | -98.2 | 0          | -99.7 | 0          |
| -55.9  | 0          | -94.9 | 0          | -96.4 | 0          |
| -52.6  | 0          | -91.6 | 0          | -93.1 | 0          |
| -49.3  | 0          | -88.3 | 0          | -89.8 | 0          |
| -46    | 0          | -85   | 0          | -86.5 | 0          |
| -42.7  | 0          | -81.7 | 0          | -83.2 | 0          |
| -39.4  | 0          | -78.4 | 0          | -79.9 | 0          |
| -36.1  | 0          | -75.1 | 0          | -76.6 | 0          |
| -32.8  | 0          | -71.8 | 0          | -73.3 | 0          |
| -29.5  | 0          | -68.5 | 0          | -70   | 0          |
| -26.2  | 0          | -65.3 | 0          | -66.7 | 0          |
| -22.9  | 8976.428   | -62   | 0          | -63.4 | 0          |
| -19.7  | 51704.813  | -58.7 | 0          | -60.1 | 0          |
| -16.4  | 133883.594 | -55.4 | 0          | -56.8 | 0          |
| -13.1  | 188834.391 | -52.1 | 0          | -53.5 | 0          |
| -9.78  | 144590.078 | -48.8 | 0          | -50.2 | 0          |
| -6.49  | 60902.801  | -45.5 | 0          | -46.9 | 0          |
| -3.2   | 14169.55   | -42.2 | 0          | -43.6 | 0          |
| 0.0934 | 0          | -38.9 | 0          | -40.3 | 0          |
| 3.38   | 0          | -35.6 | 0          | -37   | 0          |
| 6.68   | 0          | -32.3 | 0          | -33.7 | 0          |
| 9.97   | 0          | -29   | 0          | -30.4 | 0          |
| 13.3   | 0          | -25.8 | 0          | -27.1 | 2418.796   |
| 16.5   | 0          | -22.5 | 0          | -23.8 | 13117.041  |
| 19.8   | 0          | -19.2 | 0          | -20.5 | 39218.156  |
| 23.1   | 0          | -15.9 | 115.573    | -17.2 | 90254.492  |
| 26.4   | 0          | -12.6 | 13537.176  | -13.9 | 128898.391 |
| 29.7   | 0          | -9.29 | 47201.828  | -10.6 | 106704.133 |
| 33     | 0          | -6    | 93310.844  | -7.35 | 55527.992  |
| 36.3   | 0          | -2.71 | 130111.969 | -4.05 | 22361.084  |
| 39.6   | 0          | 0.582 | 137981.953 | -0.75 | 7165.441   |
| 42.9   | 0          | 3.87  | 111471.828 | 2.55  | 177.453    |
| 46.2   | 0          | 7.17  | 65476.891  | 5.85  | 0          |
| 49.5   | 0          | 10.5  | 19907.85   | 9.15  | 0          |
| 52.8   | 0          | 13.7  | 0          | 12.4  | 0          |
| 56     | 0          | 17    | 0          | 15.7  | 0          |
| 59.3   | 0          | 20.3  | 0          | 19    | 0          |
| 62.6   | 0          | 23.6  | 0          | 22.3  | 0          |
| 65.9   | 0          | 26.9  | 0          | 25.6  | 0          |
| 69.2   | 0          | 30.2  | 0          | 28.9  | 0          |
| 72.5   | 0          | 33.5  | 0          | 32.2  | 0          |
| 75.8   | 0          | 36.8  | 0          | 35.5  | 0          |
| 79.1   | 0          | 40.1  | 0          | 38.8  | 0          |
| 82.4   | 0          | 43.4  | 0          | 42.1  | 0          |
| 85.7   | 0          | 46.7  | 0          | 45.4  | 0          |
| 89     | 0          | 50    | 0          | 48.7  | 0          |
| 92.2   | 0          | 53.3  | 0          | 52    | 0          |
| 95.5   | 0          | 56.5  | 0          | 55.3  | 0          |
| 98.8   | 0          | 59.8  | 0          | 58.6  | 0          |

|     |    |      |   |      |   |
|-----|----|------|---|------|---|
| 102 | 0  | 63.1 | 0 | 61.9 | 0 |
| 105 | 0  | 66.4 | 0 | 65.2 | 0 |
| 109 | 0  | 69.7 | 0 | 68.5 | 0 |
| 112 | 0  | 73   | 0 | 71.8 | 0 |
| 115 | 0  | 76.3 | 0 | 75.1 | 0 |
| 119 | 0  | 79.6 | 0 | 78.4 | 0 |
| 122 | 0  | 82.9 | 0 | 81.7 | 0 |
| 125 | 0  | 86.2 | 0 | 85   | 0 |
| 128 | 0  | 89.5 | 0 | 88.3 | 0 |
| 132 | 0  | 92.8 | 0 | 91.6 | 0 |
| 135 | 0  | 96   | 0 | 94.9 | 0 |
| 138 | 0  | 99.3 | 0 | 98.2 | 0 |
| 142 | 0  | 103  | 0 | 102  | 0 |
| 145 | 0  | 106  | 0 | 105  | 0 |
| 148 | 0  | 109  | 0 | 108  | 0 |
| --  | -- | 113  | 0 | 111  | 0 |
| --  | -- | 116  | 0 | 115  | 0 |
| --  | -- | 119  | 0 | 118  | 0 |
| --  | -- | 122  | 0 | 121  | 0 |
| --  | -- | 126  | 0 | 125  | 0 |
| --  | -- | 129  | 0 | 128  | 0 |
| --  | -- | 132  | 0 | 131  | 0 |
| --  | -- | 136  | 0 | 135  | 0 |
| --  | -- | 139  | 0 | 138  | 0 |
| --  | -- | 142  | 0 | 141  | 0 |
| --  | -- | 145  | 0 | 144  | 0 |
| --  | -- | 149  | 0 | 148  | 0 |

#### 4.A.2.11 PPAD-LiTFSI-12M

|       |   |       |   |       |   |
|-------|---|-------|---|-------|---|
| -150  | 0 | -147  | 0 | -148  | 0 |
| -147  | 0 | -144  | 0 | -145  | 0 |
| -143  | 0 | -140  | 0 | -141  | 0 |
| -140  | 0 | -137  | 0 | -138  | 0 |
| -137  | 0 | -134  | 0 | -135  | 0 |
| -133  | 0 | -130  | 0 | -131  | 0 |
| -130  | 0 | -127  | 0 | -128  | 0 |
| -127  | 0 | -124  | 0 | -125  | 0 |
| -124  | 0 | -121  | 0 | -122  | 0 |
| -120  | 0 | -117  | 0 | -118  | 0 |
| -117  | 0 | -114  | 0 | -115  | 0 |
| -114  | 0 | -111  | 0 | -112  | 0 |
| -110  | 0 | -107  | 0 | -108  | 0 |
| -107  | 0 | -104  | 0 | -105  | 0 |
| -104  | 0 | -101  | 0 | -102  | 0 |
| -100  | 0 | -97.5 | 0 | -98.6 | 0 |
| -97.2 | 0 | -94.2 | 0 | -95.3 | 0 |
| -93.9 | 0 | -91   | 0 | -92   | 0 |
| -90.6 | 0 | -87.7 | 0 | -88.7 | 0 |
| -87.3 | 0 | -84.4 | 0 | -85.4 | 0 |
| -84   | 0 | -81.1 | 0 | -82.1 | 0 |
| -80.7 | 0 | -77.8 | 0 | -78.8 | 0 |
| -77.5 | 0 | -74.5 | 0 | -75.5 | 0 |
| -74.2 | 0 | -71.2 | 0 | -72.2 | 0 |
| -70.9 | 0 | -67.9 | 0 | -68.9 | 0 |
| -67.6 | 0 | -64.6 | 0 | -65.7 | 0 |
| -64.3 | 0 | -61.3 | 0 | -62.4 | 0 |
| -61   | 0 | -58   | 0 | -59.1 | 0 |

|       |           |       |           |       |           |
|-------|-----------|-------|-----------|-------|-----------|
| -57.7 | 0         | -54.7 | 0         | -55.8 | 0         |
| -54.4 | 0         | -51.5 | 0         | -52.5 | 0         |
| -51.1 | 0         | -48.2 | 0         | -49.2 | 0         |
| -47.8 | 0         | -44.9 | 0         | -45.9 | 0         |
| -44.6 | 0         | -41.6 | 0         | -42.6 | 0         |
| -41.3 | 0         | -38.3 | 0         | -39.3 | 0         |
| -38   | 0         | -35   | 0         | -36   | 0         |
| -34.7 | 0         | -31.7 | 0         | -32.7 | 0         |
| -31.4 | 0         | -28.4 | 0         | -29.4 | 0         |
| -28.1 | 0         | -25.1 | 0         | -26.2 | 0         |
| -24.8 | 0         | -21.8 | 0         | -22.9 | 0         |
| -21.5 | 0         | -18.5 | 0         | -19.6 | 0         |
| -18.2 | 2171.64   | -15.2 | 720.185   | -16.3 | 0         |
| -14.9 | 9516.282  | -12   | 6631.806  | -13   | 3443.197  |
| -11.7 | 22703.777 | -8.66 | 35682.719 | -9.7  | 16905.791 |
| -8.36 | 45698.383 | -5.37 | 80484.594 | -6.4  | 50261.223 |
| -5.07 | 61980.938 | -2.08 | 86358.352 | -3.11 | 87833.531 |
| -1.78 | 54865.652 | 1.21  | 59168.258 | 0.18  | 81104.055 |
| 1.51  | 39221.176 | 4.5   | 28235.869 | 3.47  | 47567.703 |
| 4.8   | 27651.076 | 7.8   | 7584.078  | 6.76  | 19122.189 |
| 8.09  | 17672.295 | 11.1  | 255.531   | 10.1  | 1276.494  |
| 11.4  | 9298.993  | 14.4  | 0         | 13.3  | 0         |
| 14.7  | 2698.311  | 17.7  | 0         | 16.6  | 0         |
| 18    | 0         | 21    | 0         | 19.9  | 0         |
| 21.2  | 0         | 24.3  | 0         | 23.2  | 0         |
| 24.5  | 0         | 27.5  | 0         | 26.5  | 0         |
| 27.8  | 0         | 30.8  | 0         | 29.8  | 0         |
| 31.1  | 0         | 34.1  | 0         | 33.1  | 0         |
| 34.4  | 0         | 37.4  | 0         | 36.4  | 0         |
| 37.7  | 0         | 40.7  | 0         | 39.7  | 0         |
| 41    | 0         | 44    | 0         | 43    | 0         |
| 44.3  | 0         | 47.3  | 0         | 46.3  | 0         |
| 47.6  | 0         | 50.6  | 0         | 49.6  | 0         |
| 50.9  | 0         | 53.9  | 0         | 52.8  | 0         |
| 54.1  | 0         | 57.2  | 0         | 56.1  | 0         |
| 57.4  | 0         | 60.5  | 0         | 59.4  | 0         |
| 60.7  | 0         | 63.8  | 0         | 62.7  | 0         |
| 64    | 0         | 67    | 0         | 66    | 0         |
| 67.3  | 0         | 70.3  | 0         | 69.3  | 0         |
| 70.6  | 0         | 73.6  | 0         | 72.6  | 0         |
| 73.9  | 0         | 76.9  | 0         | 75.9  | 0         |
| 77.2  | 0         | 80.2  | 0         | 79.2  | 0         |
| 80.5  | 0         | 83.5  | 0         | 82.5  | 0         |
| 83.8  | 0         | 86.8  | 0         | 85.8  | 0         |
| 87    | 0         | 90.1  | 0         | 89.1  | 0         |
| 90.3  | 0         | 93.4  | 0         | 92.4  | 0         |
| 93.6  | 0         | 96.7  | 0         | 95.6  | 0         |
| 96.9  | 0         | 100   | 0         | 98.9  | 0         |
| 100   | 0         | 103   | 0         | 102   | 0         |
| 103   | 0         | 107   | 0         | 106   | 0         |
| 107   | 0         | 110   | 0         | 109   | 0         |
| 110   | 0         | 113   | 0         | 112   | 0         |
| 113   | 0         | 116   | 0         | 115   | 0         |
| 117   | 0         | 120   | 0         | 119   | 0         |
| 120   | 0         | 123   | 0         | 122   | 0         |
| 123   | 0         | 126   | 0         | 125   | 0         |
| 127   | 0         | 130   | 0         | 129   | 0         |
| 130   | 0         | 133   | 0         | 132   | 0         |



|     |   |     |   |     |   |
|-----|---|-----|---|-----|---|
| 133 | 0 | 136 | 0 | 135 | 0 |
| 136 | 0 | 139 | 0 | 138 | 0 |
| 140 | 0 | 143 | 0 | 142 | 0 |
| 143 | 0 | 146 | 0 | 145 | 0 |
| 146 | 0 | 149 | 0 | 148 | 0 |
| 150 | 0 |     |   |     |   |

### **4.A.3. Resistivity (PPAD)**

#### **4.A.3.1 PPAD-BIE**

Ohm.m    Std D.  
66.89707    5.30687

#### **4.A.3.2 PPAD-BIE-2M**

Ohm.m    Std D.  
134.11082    0.64829

#### **4.A.3.3 PPAD-AIE**

Ohm.m    Std D.  
30.53628    0.73889

#### **4.A.3.4 PPAD-AIE-2M**

Ohm.m    Std D.  
32.81519    1.34035

#### **4.A.3.5 PPAD-AIE-12M**

Ohm.m    Std D.  
220.32492    3.2306

#### **4.A.3.6 PPAD-RAL**

Ohm.m    Std D.  
16.20685    1.65753

#### **4.A.3.7 PPAD-RAL-12M**

Ohm.m    Std D.  
21.64683    1.16662

#### **4.A.3.8 PPAD-RAL-EG**

Ohm.m    Std D.  
0.22959    0.08048

#### **4.A.3.9 PPAD-RAL-EG-12M**

Ohm.m    Std D.  
0.65596    0.01463

### **4.A.4. Conductivity (PPAD)**

#### **4.A.4.1 PPAD-BIE**

|           |         |
|-----------|---------|
| Siemens/m | Std D.  |
| 0.01501   | 0.00117 |

#### **4.A.4.2 PPAD-BIE-2M**

|           |            |
|-----------|------------|
| Siemens/m | Std D      |
| 0.00746   | 3.60772E-5 |

#### **4.A.4.3 PPAD-AIE**

|           |            |
|-----------|------------|
| Siemens/m | Std D      |
| 0.03276   | 7.86107E-4 |

#### **4.A.4.4 PPAD-AIE-2M**

|           |         |
|-----------|---------|
| Siemens/m | Std D   |
| 0.03051   | 0.00124 |

#### **4.A.4.5 PPAD-AIE-12M**

|           |            |
|-----------|------------|
| Siemens/m | Std D      |
| 0.00454   | 6.69639E-5 |

#### **4.A.4.6 PPAD-RAL**

|           |         |
|-----------|---------|
| Siemens/m | Std D   |
| 0.06215   | 0.00656 |

#### **4.A.4.7 PPAD-RAL-12M**

|           |         |
|-----------|---------|
| Siemens/m | Std D   |
| 0.04629   | 0.00248 |

#### **4.A.4.8 PPAD-RAL-EG**

|           |         |
|-----------|---------|
| Siemens/m | Std D   |
| 4.67561   | 1.37084 |

#### **4.A.4.9 PPAD-RAL-EG-12M**

|           |        |
|-----------|--------|
| Siemens/m | Std D  |
| 1.52498   | 0.0338 |

### **4.A.5. Resistivity (PPAD-LiTFSI)**

#### **4.A.5.1 PPAD-LiTFSI**

|          |         |
|----------|---------|
| Ohm.m    | Std D.  |
| 77.87317 | 3.29696 |

#### **4.A.5.2 PPAD-LiTFSI-2M**

|           |         |
|-----------|---------|
| Ohm.m     | Std D.  |
| 389.51853 | 2.11387 |

#### **4.A.5.3 PPAD-LiTFSI-12M**

Ohm.m                      Std D.  
28613.62589                1603.43147

#### **4.A.5.4 PPAD-LiTFSI-RAL**

Ohm.m                      Std D.  
87.80312                    3.69152

#### **4.A.5.5 PPAD-LiTFSI-RAL-12M**

Ohm.m                      Std D.  
112.03422                  3.89961

#### **4.A.5.6 PPAD-LiTFSI-RAL-EG**

Ohm.m                      Std D.  
8.00164                     0.34448

#### **4.A.5.7 PPAD-LiTFSI-RAL-EG-12M**

Ohm.m                      Std D.  
31.23748                    3.47544

### **4.A.6. Conductivity (PPAD-LiTFSI)**

#### **4.A.6.1 PPAD-LiTFSI**

Siemens/m                 Std D.  
0.01286                     5.57421E-4

#### **4.A.6.2 PPAD-LiTFSI-2M**

Siemens/m                 Std D.  
0.00257                     1.38984E-5

#### **4.A.6.3 PPAD-LiTFSI-12M**

Siemens/m                 Std D.  
3.50237E-5                  2.01605E-6

#### **4.A.6.4 PPAD-LiTFSI-RAL**

Siemens/m                 Std D.  
0.0114                      4.78757E-4

#### **4.A.6.5 PPAD-LiTFSI-RAL-12M**

Siemens/m                 Std D.  
0.00893                     3.0635E-4

#### **4.A.6.6 PPAD-LiTFSI-RAL-EG**

Siemens/m                 Std D.  
0.12513                     0.00526

#### **4.A.6.7 PPAD-LiTFSI-RAL-EG-12M**

Siemens/m                 Std D.

0.03227

0.00341

### 4.A.7. *In Vitro* Cytocompatibility Analysis

#### 4.A.7.1 L929 MTT

|       |       |       |       |
|-------|-------|-------|-------|
| 0,450 | 0,478 | 0,442 | 0,401 |
| 0,490 | 0,467 | 0,482 | 0,428 |
| 0,410 | 0,389 | 0,419 | 0,352 |

#### 4.A.7.2 L929 LDH

|       |       |       |       |       |
|-------|-------|-------|-------|-------|
| 0,283 | 0,309 | 0,302 | 0,346 | 2,817 |
| 0,281 | 0,322 | 0,307 | 0,335 | 2,987 |
| 0,280 | 0,317 | 0,307 | 0,324 | 2,840 |

#### 4.A.7.3 SHSY5 MTT

|       |       |       |
|-------|-------|-------|
| 0,402 | 0,358 | 0,316 |
| 0,400 | 0,353 | 0,321 |
| 0,390 | 0,373 | 0,332 |

#### 4.A.7.4 SHSY5 LDH

|       |       |       |
|-------|-------|-------|
| 2,164 | 0,362 | 0,421 |
| 2,353 | 0,345 | 0,271 |
| 2,256 | 0,362 | 0,419 |

#### 4.A.7.5 SHSY5 ALAMAR

|       |       |       |       |       |       |       |       |
|-------|-------|-------|-------|-------|-------|-------|-------|
| 0,031 | 0,065 | 0,132 | 0,300 | 0,052 | 0,117 | 0,151 | 0,253 |
| 0,029 | 0,081 | 0,138 | 0,282 | 0,052 | 0,090 | 0,149 | 0,240 |
| 0,041 | 0,071 | 0,128 | 0,310 | 0,040 | 0,100 | 0,150 | 0,220 |

### 4.B. ESI ANALYSES

#### 4.B.1. FTIR

##### 4.B.1.1 PPAD-BIE

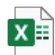

PPAD-BIE-FTIR.CSV

#### 4.B.1.2 PPAD-AIE

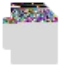

PPAD-AIE-FTIR.xlsx

#### 4.B.1.3 PPAD-LiTFSI

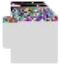

PPAD-LiTFSI-FTIR.CSV

#### 4.B.1.4 PDMS

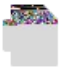

PDMS-FTIR.CSV

### 4.B.2. Resistance - Before Stretching (PPAD-RAL-EG-PDMS)

#### 4.B.2.1 Channel 1

| Ohm       | Std D.  |
|-----------|---------|
| 826.66667 | 9.29157 |

#### 4.B.2.2 Channel 2

| Ohm | Std D.  |
|-----|---------|
| 924 | 6.55744 |

#### 4.B.2.3 Channel 3

| Ohm       | Std D.  |
|-----------|---------|
| 894.33333 | 12.2202 |

#### 4.B.2.4 Channel 4

| Ohm | Std D.   |
|-----|----------|
| 866 | 19.31321 |

#### 4.B.2.5 Top Channel

| Ohm       | Std D.   |
|-----------|----------|
| 638.33333 | 18.44813 |

### 4.B.3. Resistance - After Stretching (PPAD-RAL-EG-PDMS)

#### 4.B.3.1 Channel 1

| Ohm  | Std D.   |
|------|----------|
| 4467 | 78.63205 |

#### 4.B.3.2 Channel 2

|            |          |
|------------|----------|
| Ohm        | Std D.   |
| 2121.66667 | 54.09559 |

### **4.B.3.3 Channel 3**

|      |          |
|------|----------|
| Ohm  | Std D.   |
| 2852 | 17.69181 |

### **4.B.3.4 Channel 4**

|      |           |
|------|-----------|
| Ohm  | Std D.    |
| 2390 | 144.64785 |

### **4.B.3.5 Top Channel**

|            |           |
|------------|-----------|
| Ohm        | Std D.    |
| 2730.33333 | 187.02228 |

## **4.B.4. Resistance - Before Stretching (PPAD-LiTFSI-RAL-EG-PDMS)**

### **4.B.4.1 Channel 1**

|            |           |
|------------|-----------|
| Ohm        | Std D.    |
| 1561.66667 | 157.19521 |

### **4.B.4.2 Channel 2**

|            |          |
|------------|----------|
| Ohm        | Std D.   |
| 1340.33333 | 26.72702 |

### **4.B.4.3 Channel 3**

|            |         |
|------------|---------|
| Ohm        | Std D.  |
| 1590.33333 | 4.72582 |

### **4.B.4.4 Channel 4**

|            |          |
|------------|----------|
| Ohm        | Std D.   |
| 1758.33333 | 631.8705 |

### **4.B.4.5 Top Channel**

|      |          |
|------|----------|
| Ohm  | Std D.   |
| 1653 | 66.91039 |

## **4.B.5. Resistance - After Stretching (PPAD-LiTFSI-RAL-EG-PDMS)**

### **4.B.5.1 Channel 1**

|            |           |
|------------|-----------|
| Ohm        | Std D.    |
| 4122.66667 | 121.96858 |

### **4.B.5.2 Channel 2**

|            |           |
|------------|-----------|
| Ohm        | Std D.    |
| 1937.66667 | 106.25127 |

### 4.B.5.3 Channel 3

|      |          |
|------|----------|
| Ohm  | Std D.   |
| 4536 | 11.78983 |

### 4.B.5.4 Channel 4

|            |          |
|------------|----------|
| Ohm        | Std D.   |
| 4462.66667 | 117.2277 |

### 4.B.5.5 Top Channel

|            |          |
|------------|----------|
| Ohm        | Std D.   |
| 2205.66667 | 20.00833 |

### 4.B.6. Degradation (Mass Loss)

| Pure PDMS |             |         | PPAD-RAL-EG-PDMS |             |         | PPAD-LiTFSI-RAL-EG-PDMS |             |         |
|-----------|-------------|---------|------------------|-------------|---------|-------------------------|-------------|---------|
| Day       | % Mass Loss | Std. D. | Day              | Mass Loss % | Std. D. | Day                     | Mass Loss % | Std. D. |
| 0         | 0           | --      | 0                | 0           | --      | 0                       | 0           | --      |
| 1         | -0.0841     | 0.00546 | 1                | -0.19268    | 0.00171 | 1                       | 1.39027     | 0.00626 |
| 7         | -0.84104    | 0.00524 | 7                | -0.57803    | 0.00191 | 7                       | 0.59583     | 0.00606 |
| 14        | -0.33642    | 0.00539 | 14               | -0.77071    | 0.0017  | 14                      | 0.99305     | 0.00621 |
| 21        | 0           | 0.0052  | 21               | 0.28902     | 0.00165 | 21                      | 1.39027     | 0.00636 |
| 28        | 0           | 0.00518 | 28               | -0.38536    | 0.00159 | 28                      | 1.68818     | 0.00617 |

### 4.B.7. pH Change During Degradation

| Pure PDMS |         | PPAD-RAL-EG-PDMS |         | PPAD-LiTFSI-RAL-EG-PDMS |         |
|-----------|---------|------------------|---------|-------------------------|---------|
| Day       | pH      | Day              | pH      | Day                     | pH      |
| 0         | 7.24    | 0                | 7.24    | 0                       | 7.24    |
| 1         | 7.23667 | 1                | 7.21667 | 1                       | 7.22    |
| 7         | 7.19667 | 7                | 7.15333 | 7                       | 7.13667 |
| 14        | 7.14667 | 14               | 7.14667 | 14                      | 7.13333 |
| 21        | 7.14333 | 21               | 7.19667 | 21                      | 7.22333 |
| 28        | 7.11333 | 28               | 7.18667 | 28                      | 7.13333 |

### 4.B.8. Swelling

| Pure PDMS |                 |         | PPAD-RAL-EG-PDMS |                 |         | PPAD-LiTFSI-RAL-EG-PDMS |                 |         |
|-----------|-----------------|---------|------------------|-----------------|---------|-------------------------|-----------------|---------|
| Hour      | Swelling Rate % | Std. D. | Hour             | Swelling Rate % | Std. D. | Day                     | Swelling Rate % | Std. D. |
| 0         | 0               |         | 0                | 0               |         | 0                       | 0               |         |
| 1         | 1.54799         | 0.00365 | 1                | 0.89021         | 0.00163 | 1                       | 0.80257         | 0.00176 |
| 6         | 1.70279         | 0.00386 | 6                | 1.78042         | 0.00142 | 6                       | 0.5618          | 0.00167 |
| 12        | 4.48916         | 0.00519 | 12               | 3.33828         | 0.00122 | 12                      | 1.52488         | 0.00174 |
| 24        | 6.19195         | 0.0051  | 24               | 5.04451         | 0.00165 | 24                      | 1.84591         | 0.00174 |
